# Supplementary material for: Concerning the 1,5-stereocontrol in tin(iv) chloride promoted reactions of 4- and 5-alkoxyalk-2-enylstannanes: trapping intermediate allyltin trichlorides using phenyllithium
Source: Royal Society of Chemistry journal article supplement (doi:10.1039/c2ob25765c), 2012-01-01

HE  
DA  
SF  
DI  
SI  
TD  
SW  
PW  
RD  
AQ  
RG  
NS  
OZ  
DP  
LB  
CY  
SR

C-13 75MHz 767C L.HOBSON LAH21 CDCL3

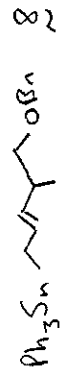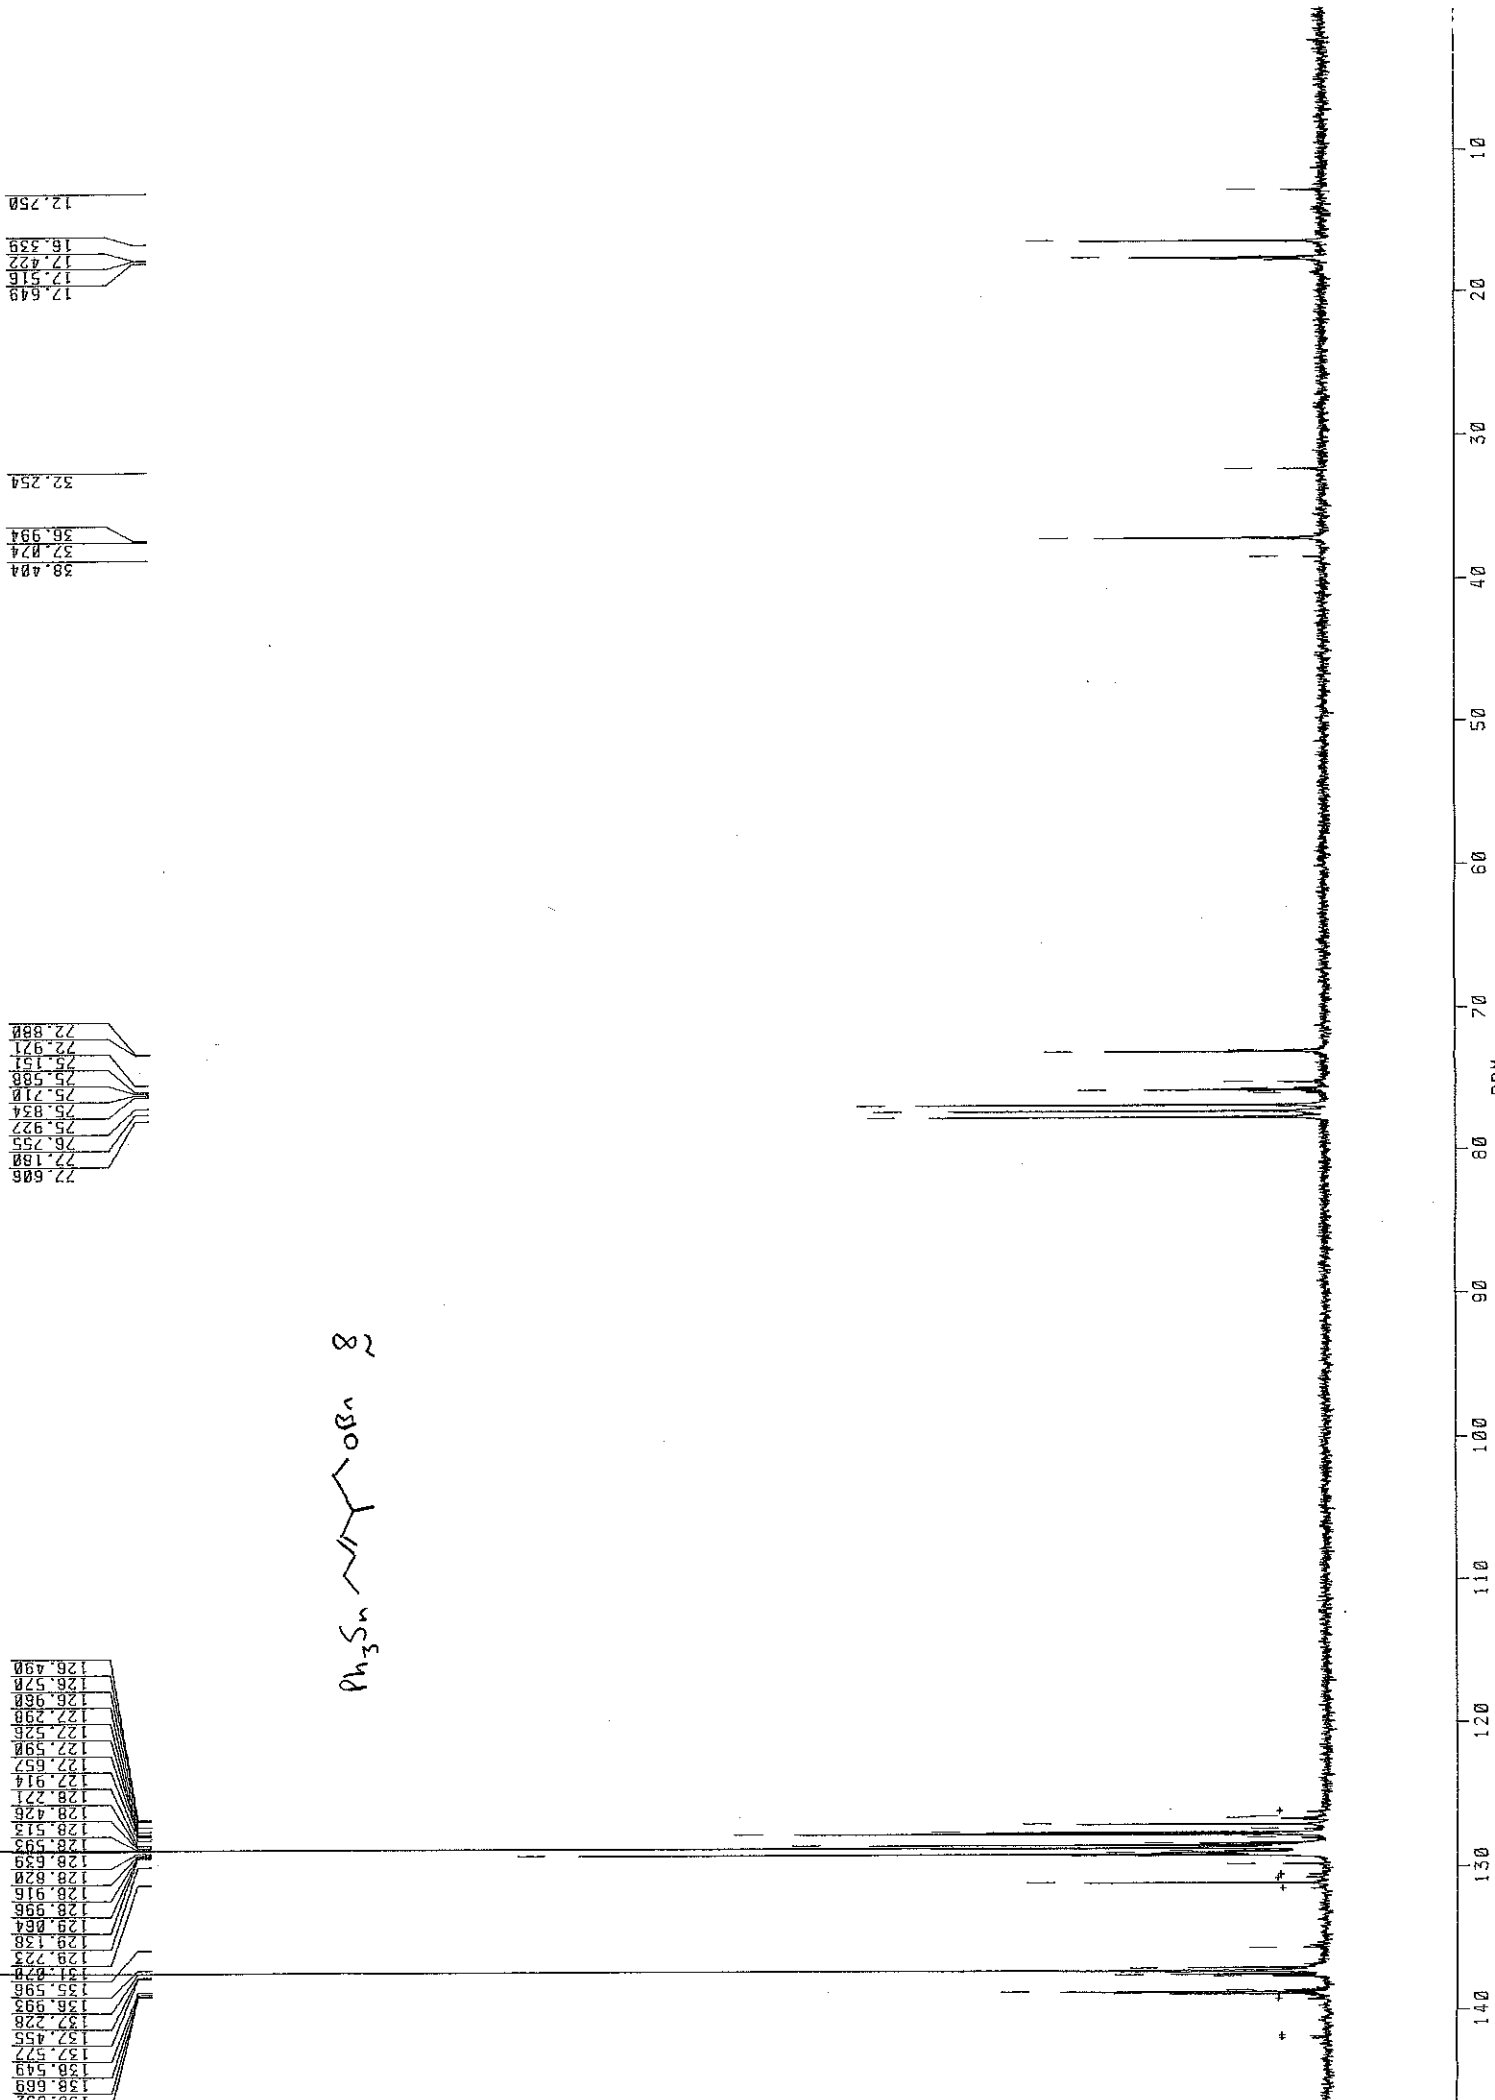

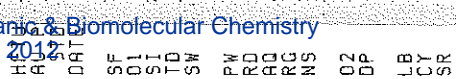

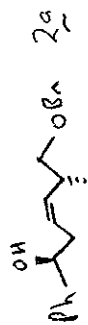

Div  
2x phenyl

CH<sub>2</sub> CH-O

25

12/1

五

三、

3

6. W

34 Me

me

anic & Bioorganic Chemistry

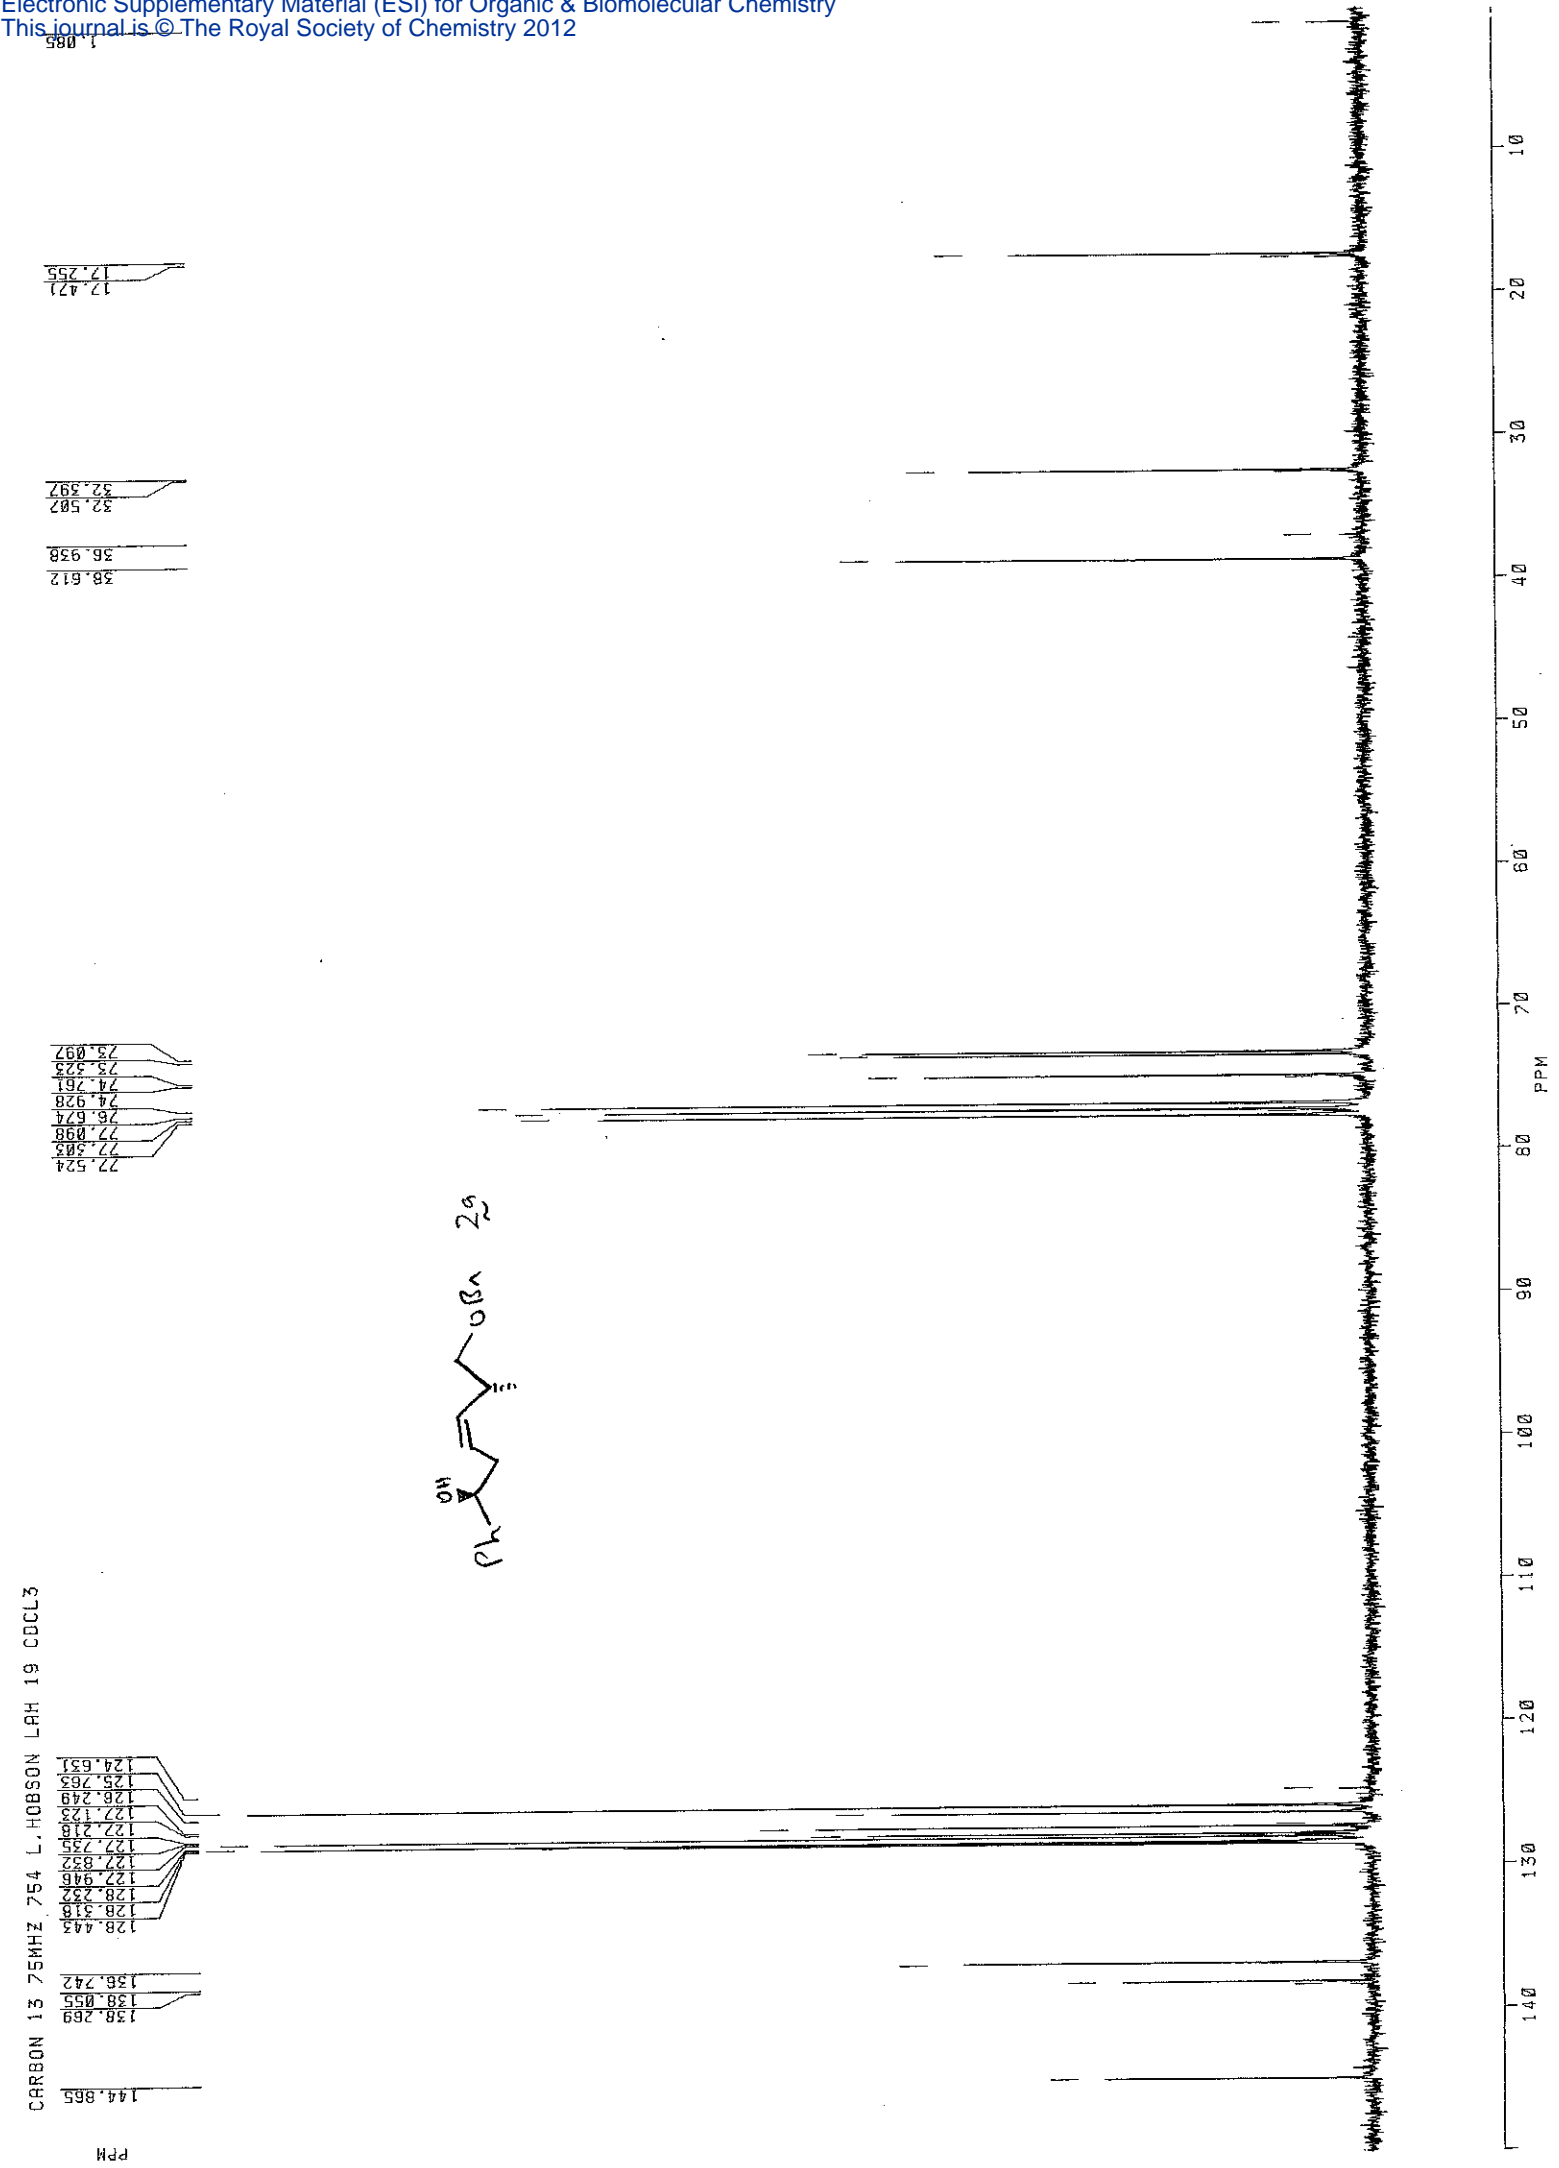

Lindsay Hobson LAH 305 FS-16  
STANDARD 1H OBSERVE

Solvent: CDCl<sub>3</sub>  
Ambient temperature  
Sample #2  
F1: 201  
Queue name Mar24a  
DATE Mar 24 97  
INOVA-300 "athos"  
PULSE SEQUENCE  
Relax. delay 3.300 sec  
Pulse 15.0 degrees  
Acq. time 3.641 sec  
Width 4455.9 Hz  
8 repetitions  
OBSERVE H1, 299.8455305 MHz  
DATA PROCESSING  
Line broadening 0.3 Hz  
FT size 65536  
Total time 1 minute

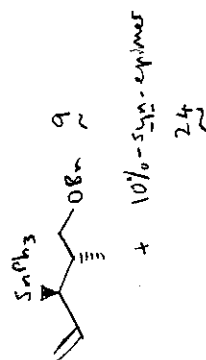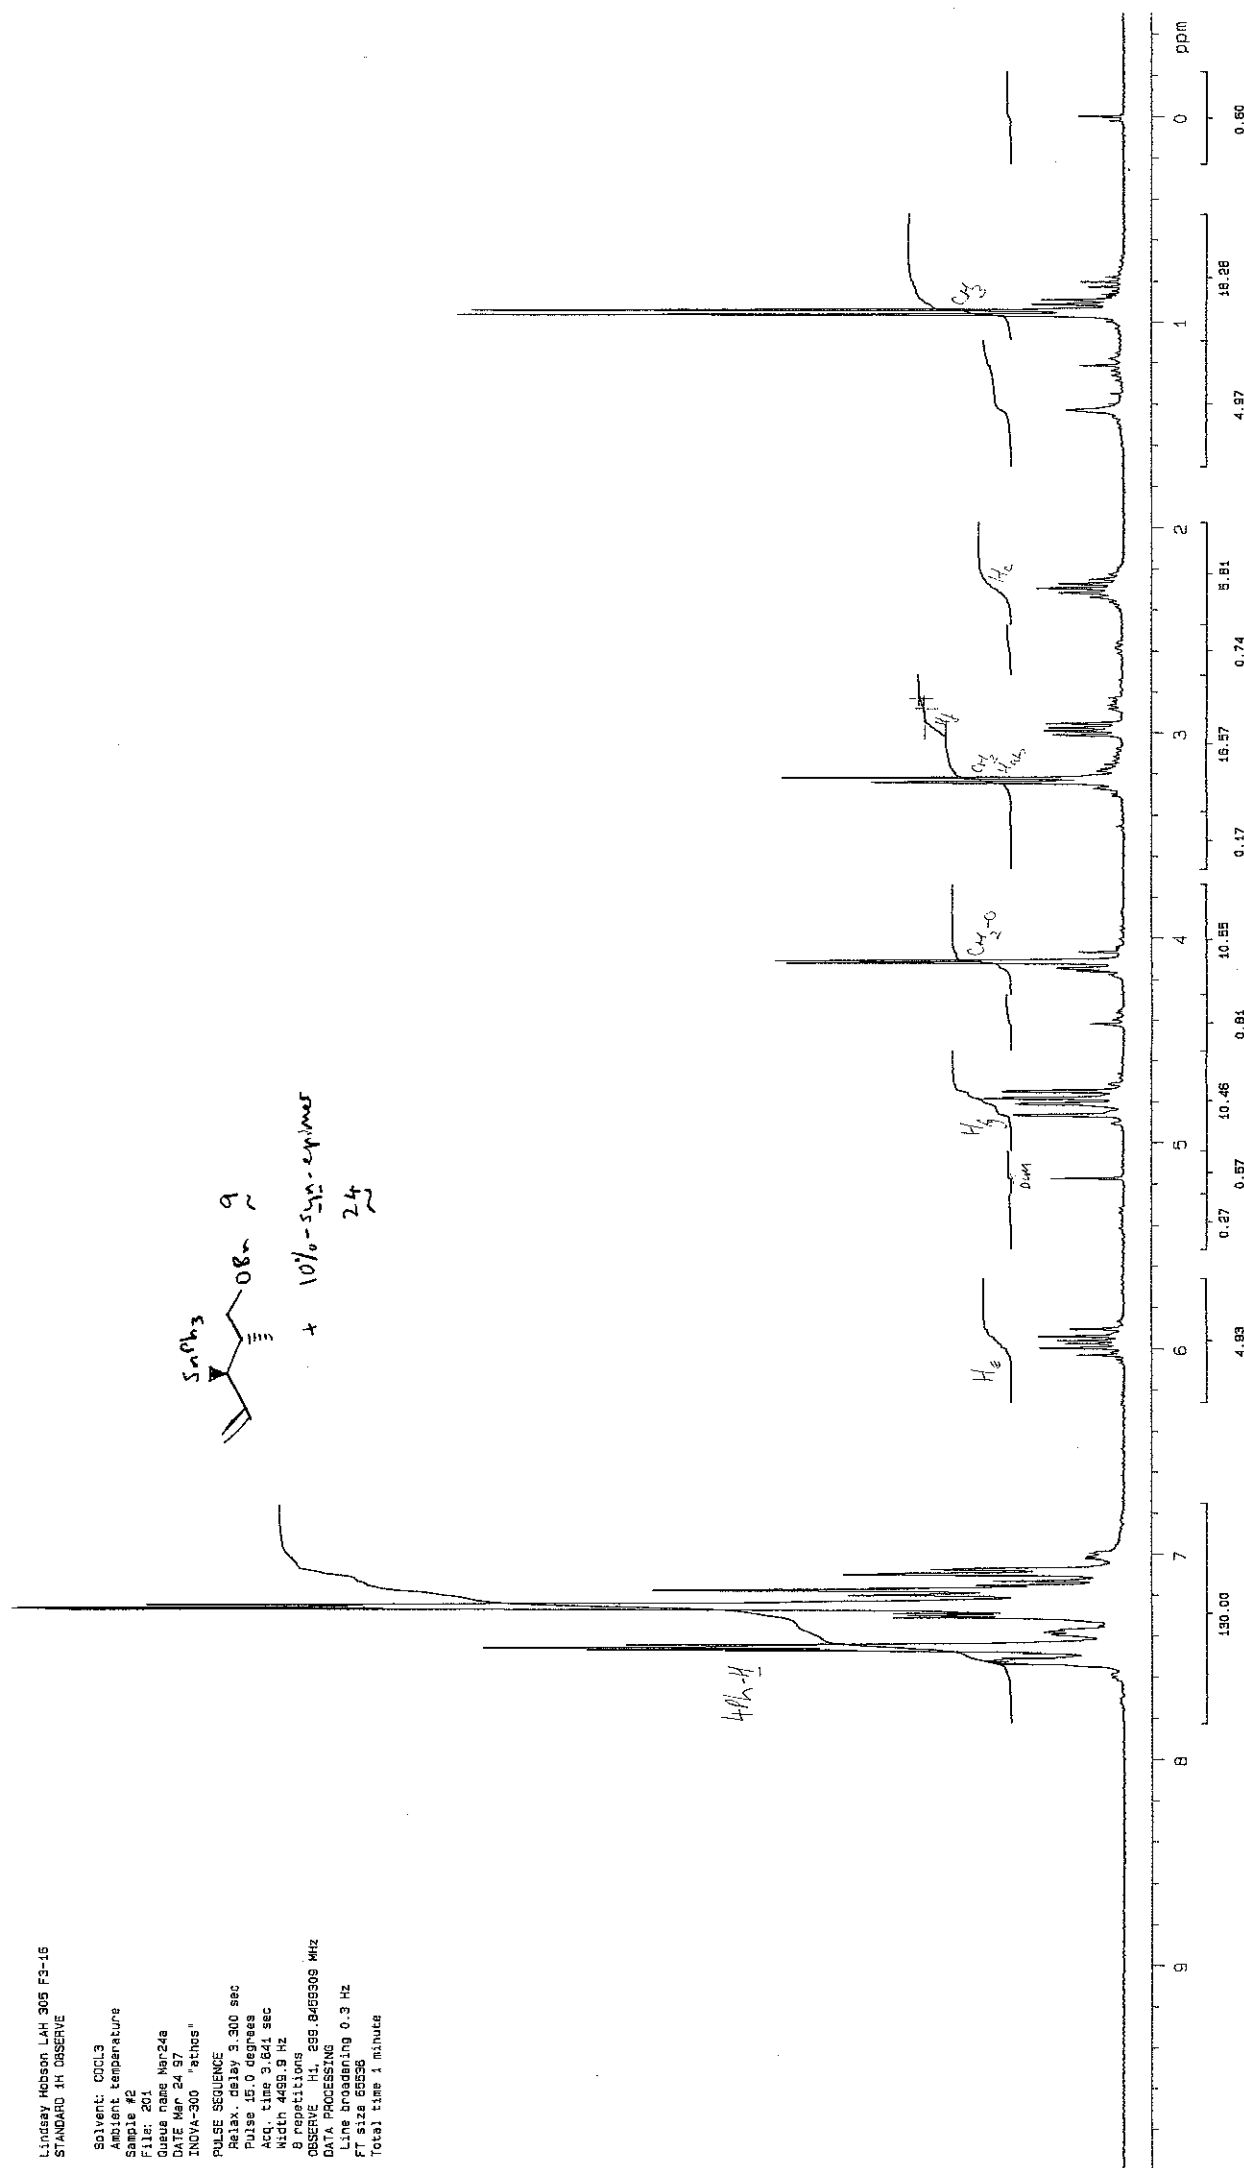

Lindsay Hobson LAH 305 F3-16  
STANDARD 1H OBSERVE

Solvent: CDCl3  
Ambient temperature  
Sample #2  
File: 202  
Queue name: Mar24a  
DATE: Mar 24 07  
INOVA-300 "athos"  
PULSE SEQUENCE  
Pulse 45.0 degrees  
Acq. time 1.638 sec  
Width 20000.0 Hz  
180 repetitions  
OBSERVE C13, 76.3953141 MHz  
DECOUPLE H1, 299.8473785 MHz  
Power 40 dB  
continuously on  
WALTZ-16 modulated  
DATA PROCESSING  
Line broadening 1.0 Hz  
FT size 85536  
Total time 4 minutes

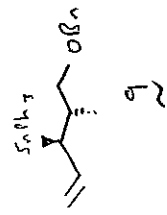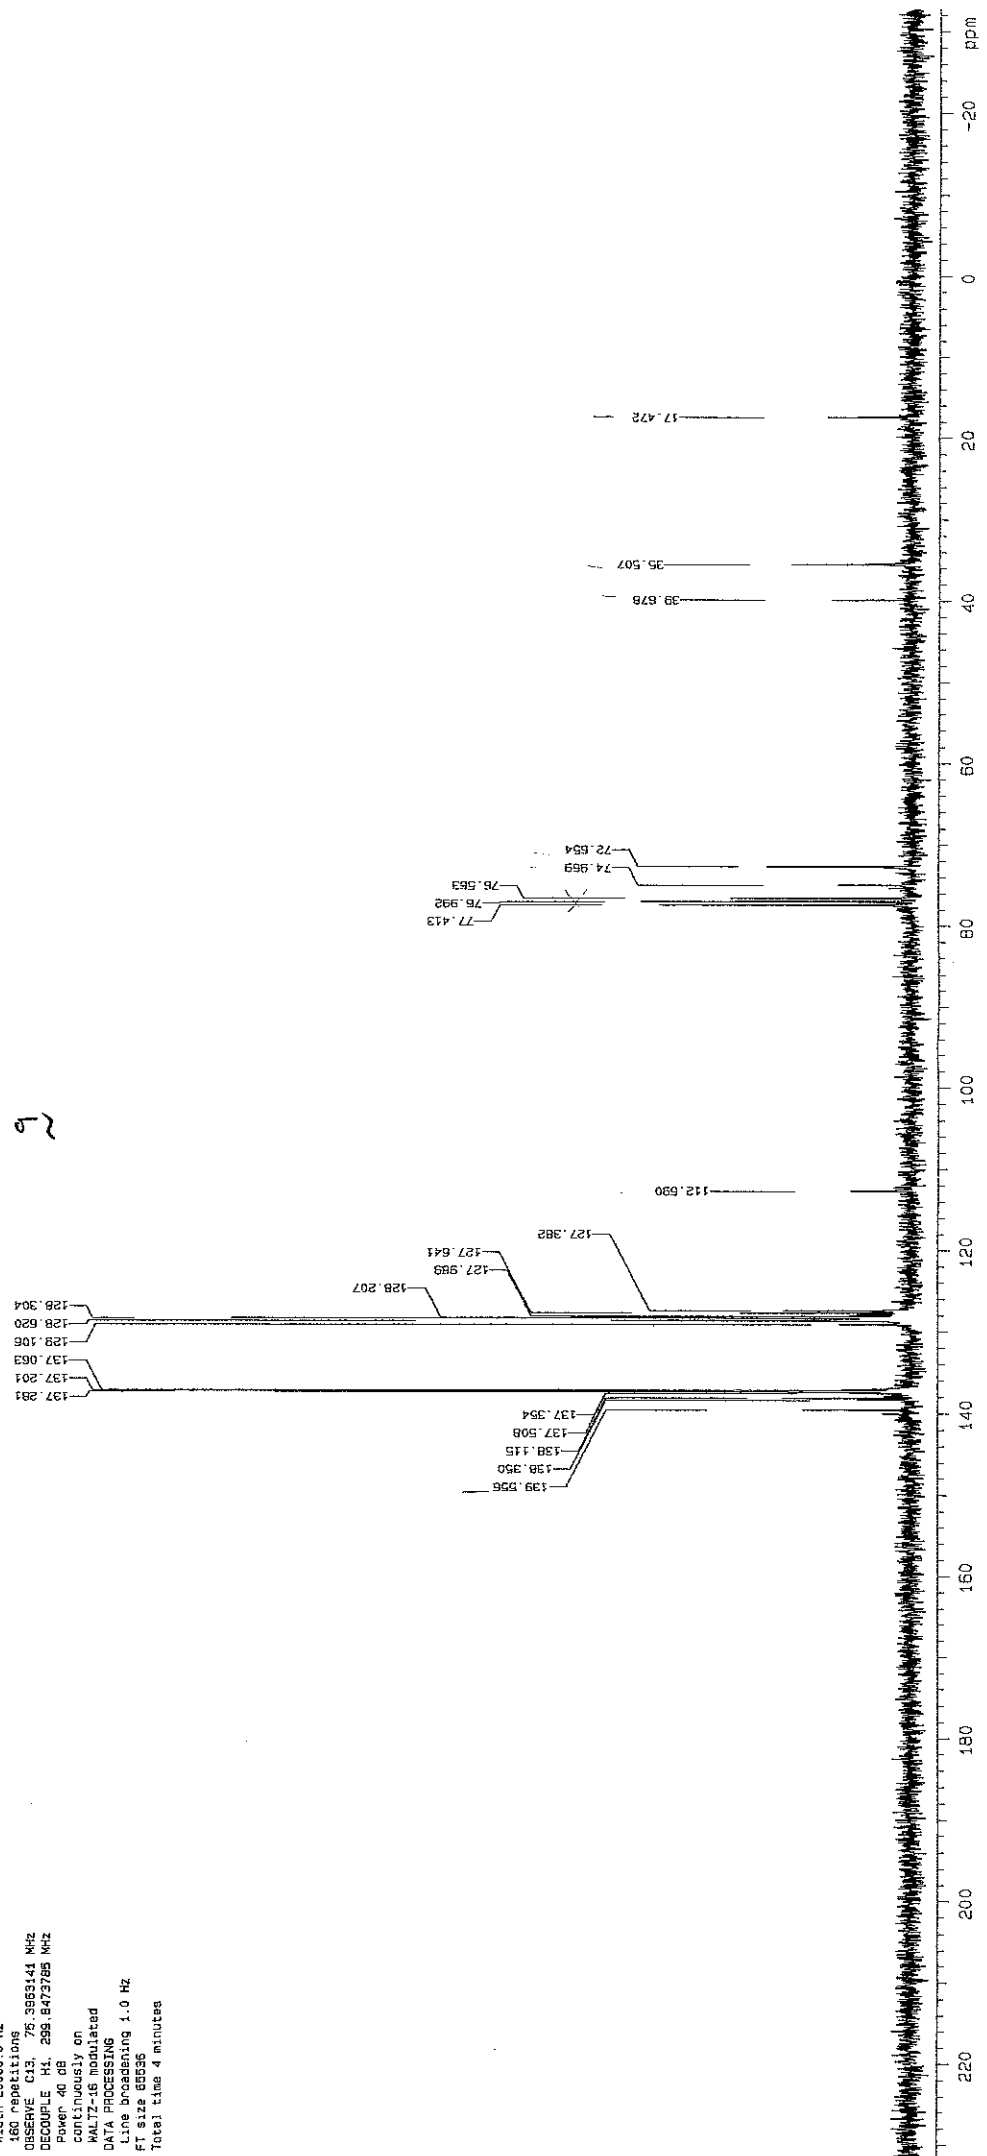

PROTON 300MHz 503 L.HOROSM LAY20 CDCL3

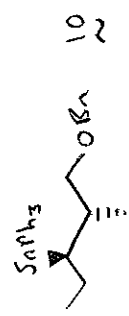

+ 10% sym-silanes 25

4xPhenyl  
mp

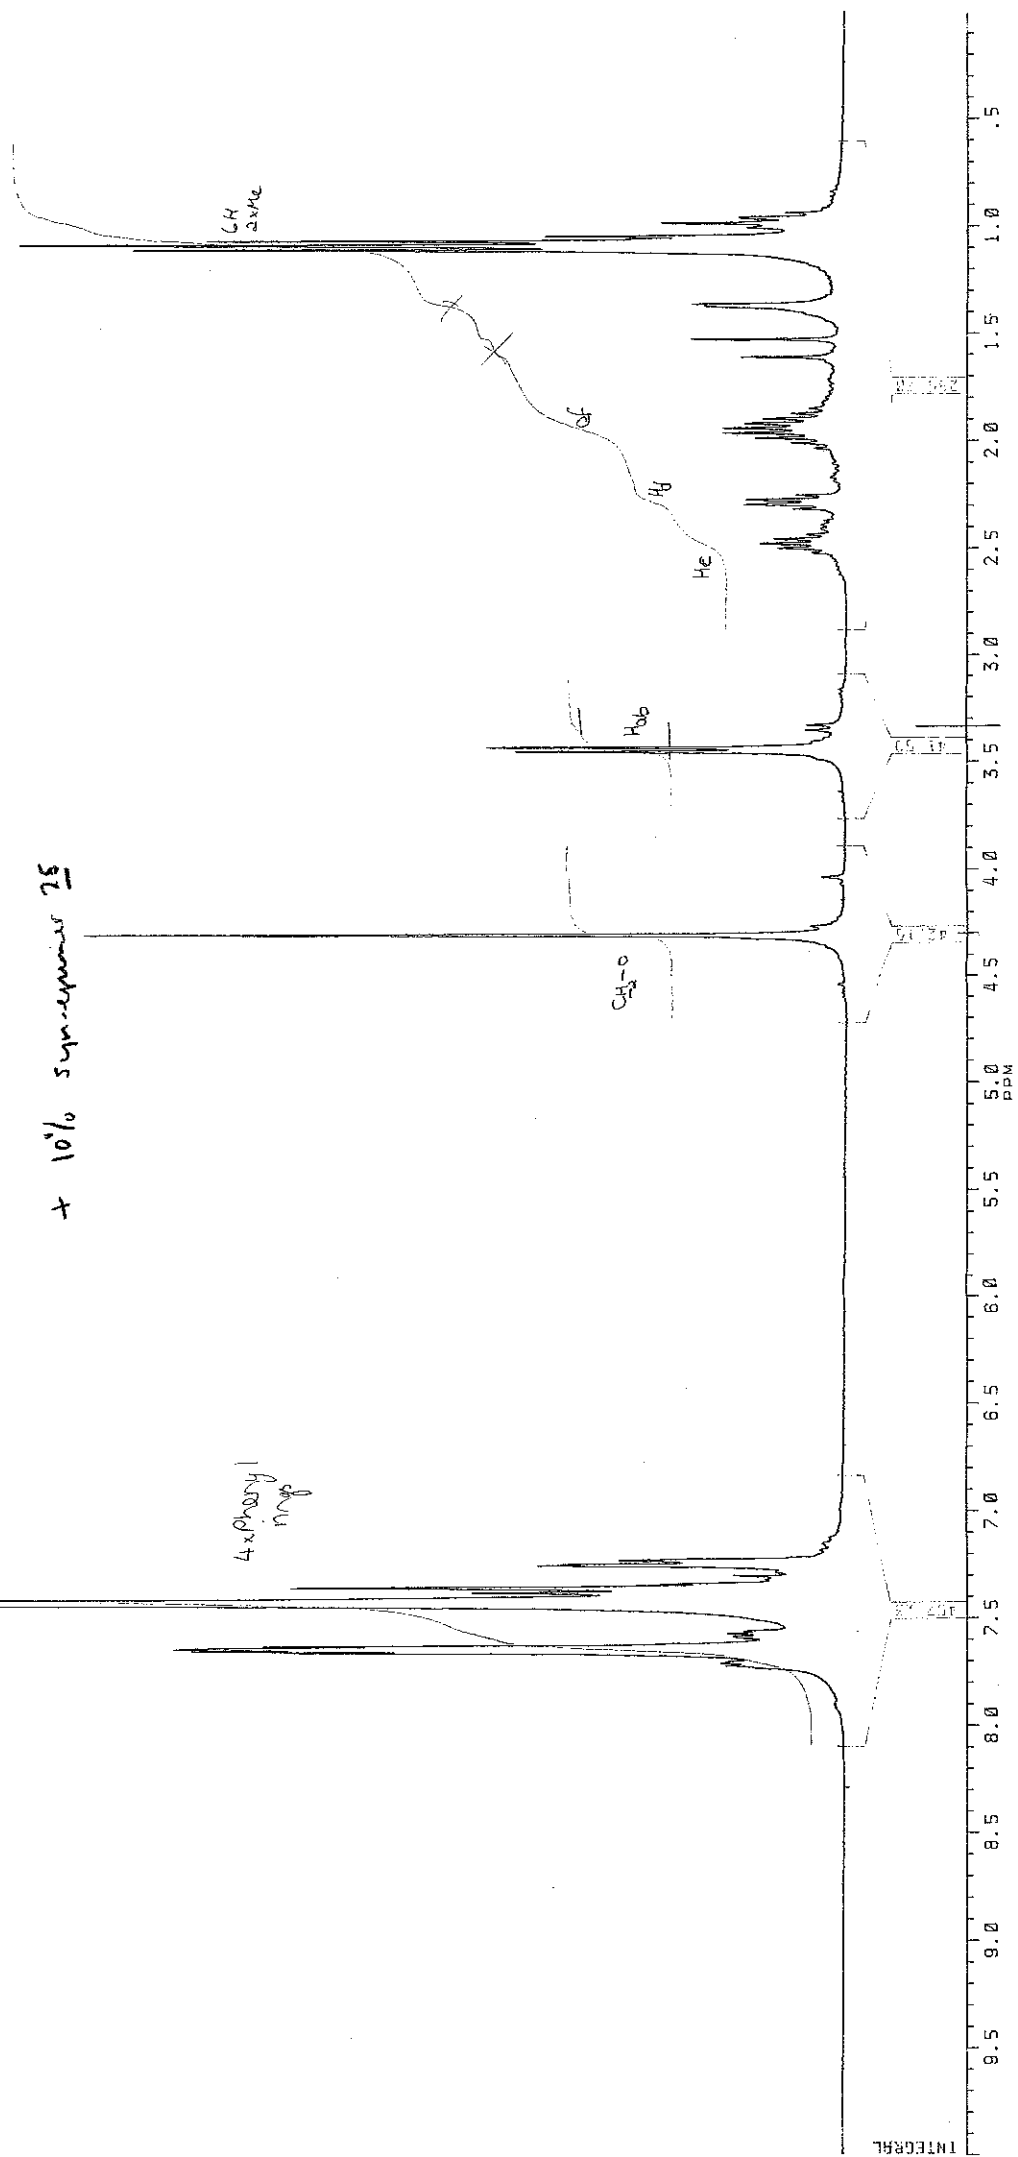

INTEGRAL

L HOBSON LAR 112 C13 75MHZ CDCL3 375

PPM

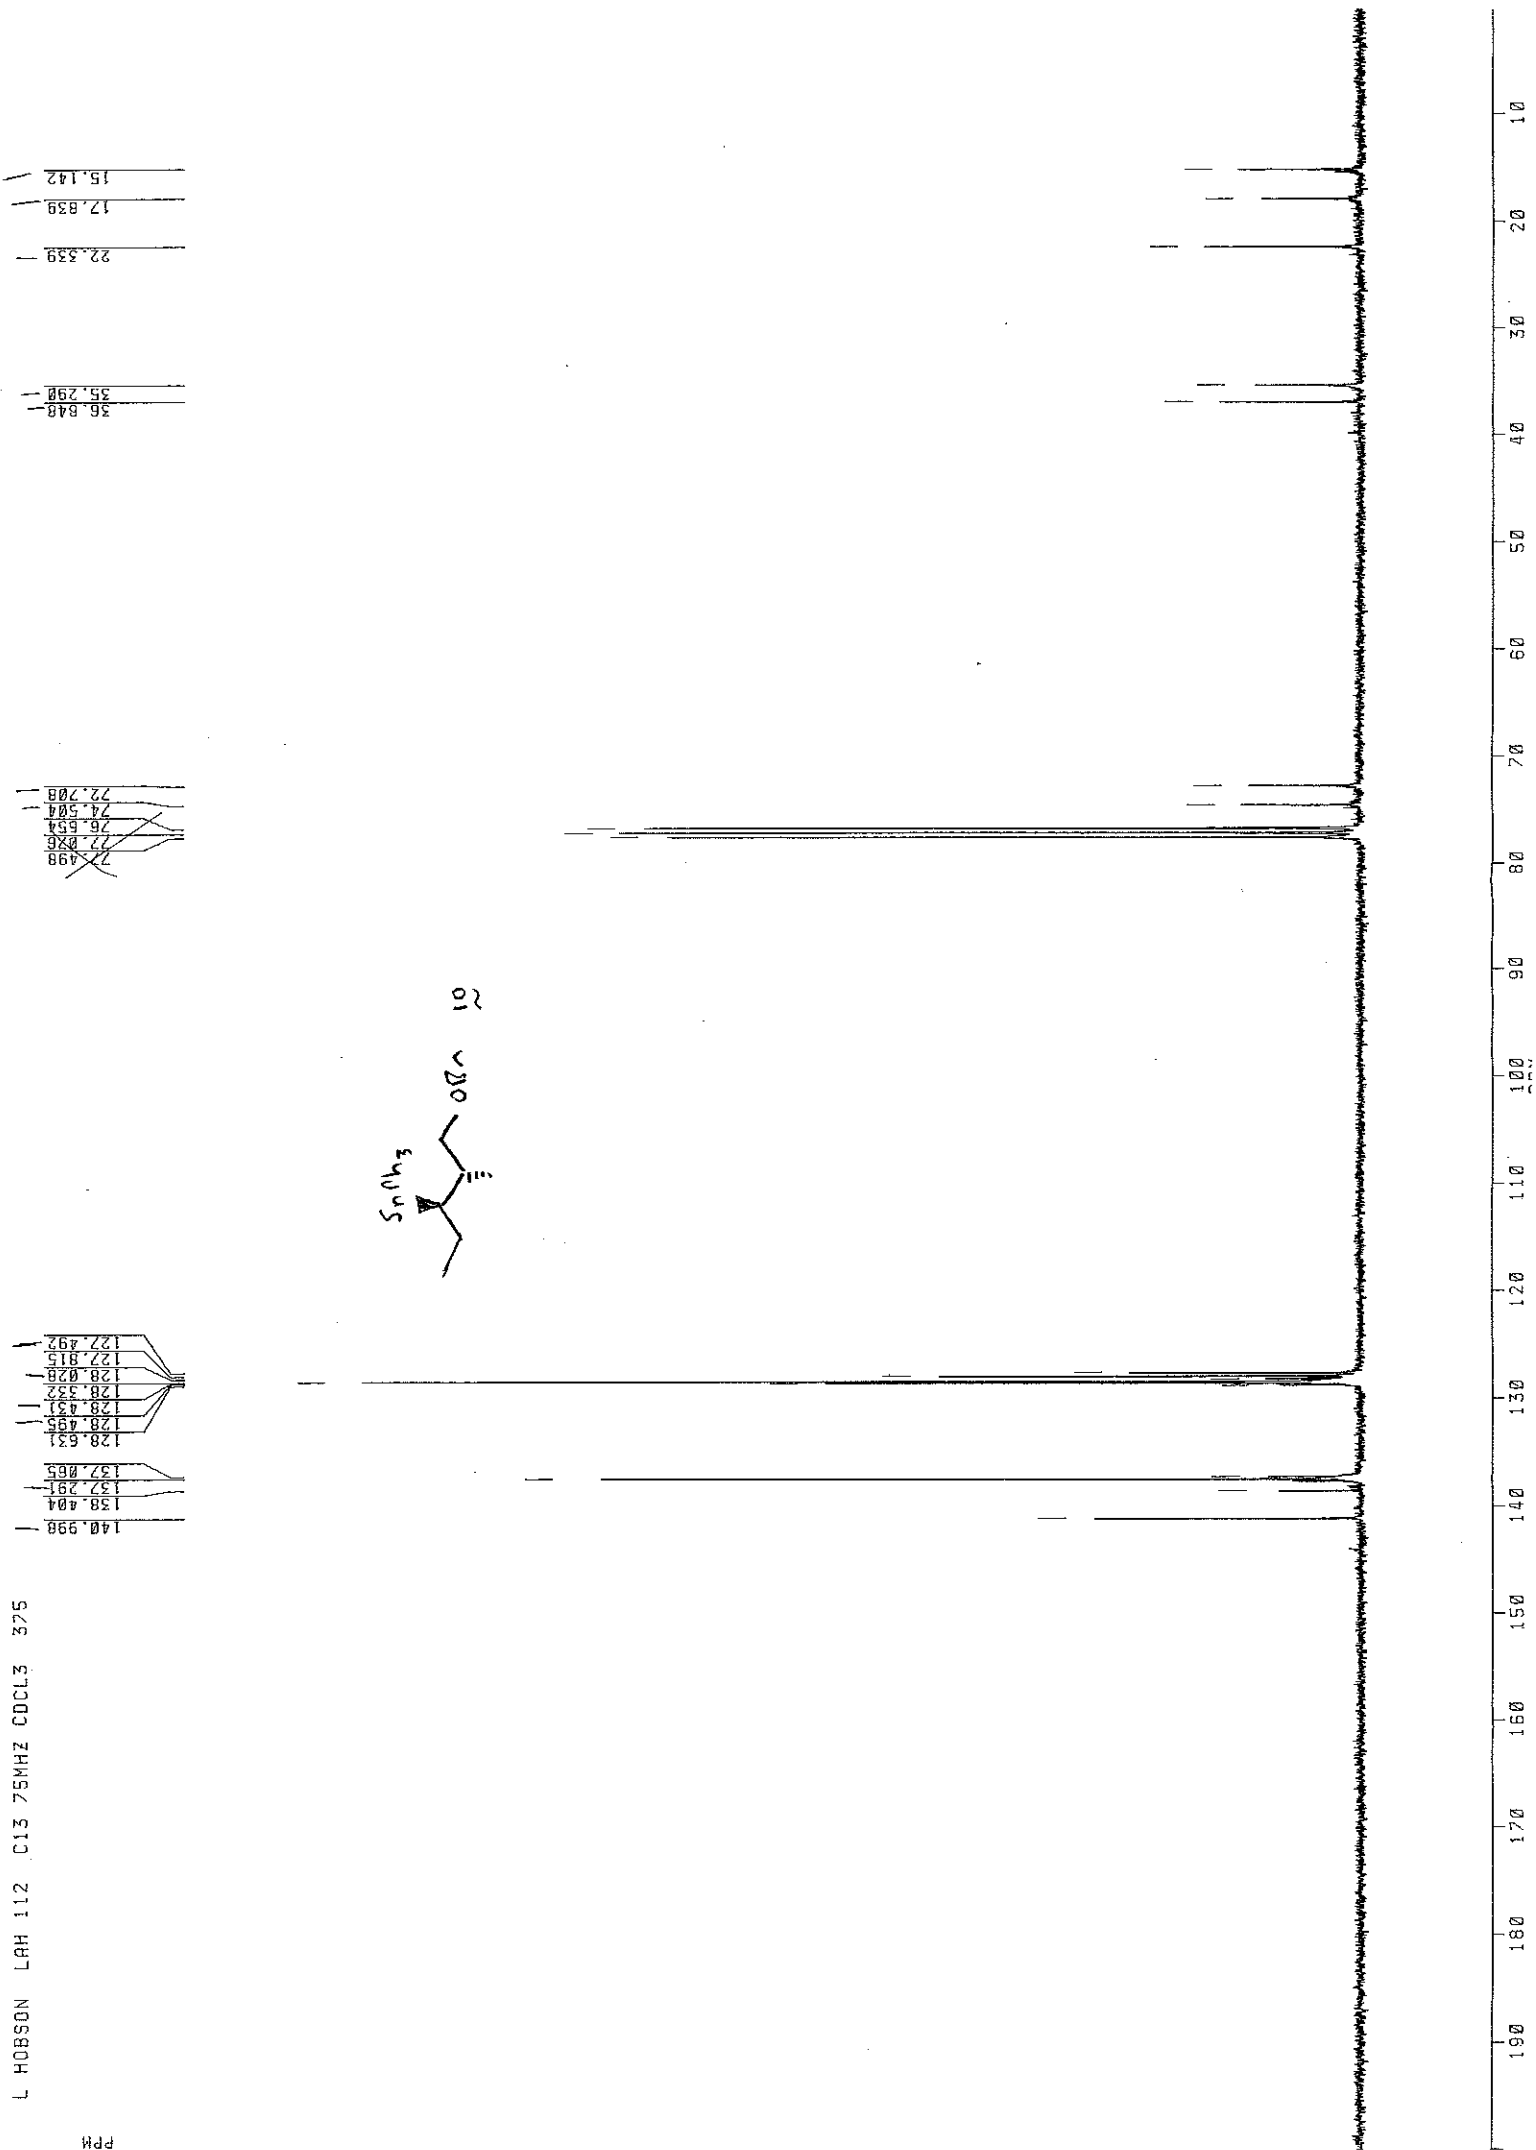



PROTON 300MHz 031 L.HOBSON L94 43.3 (DCL3

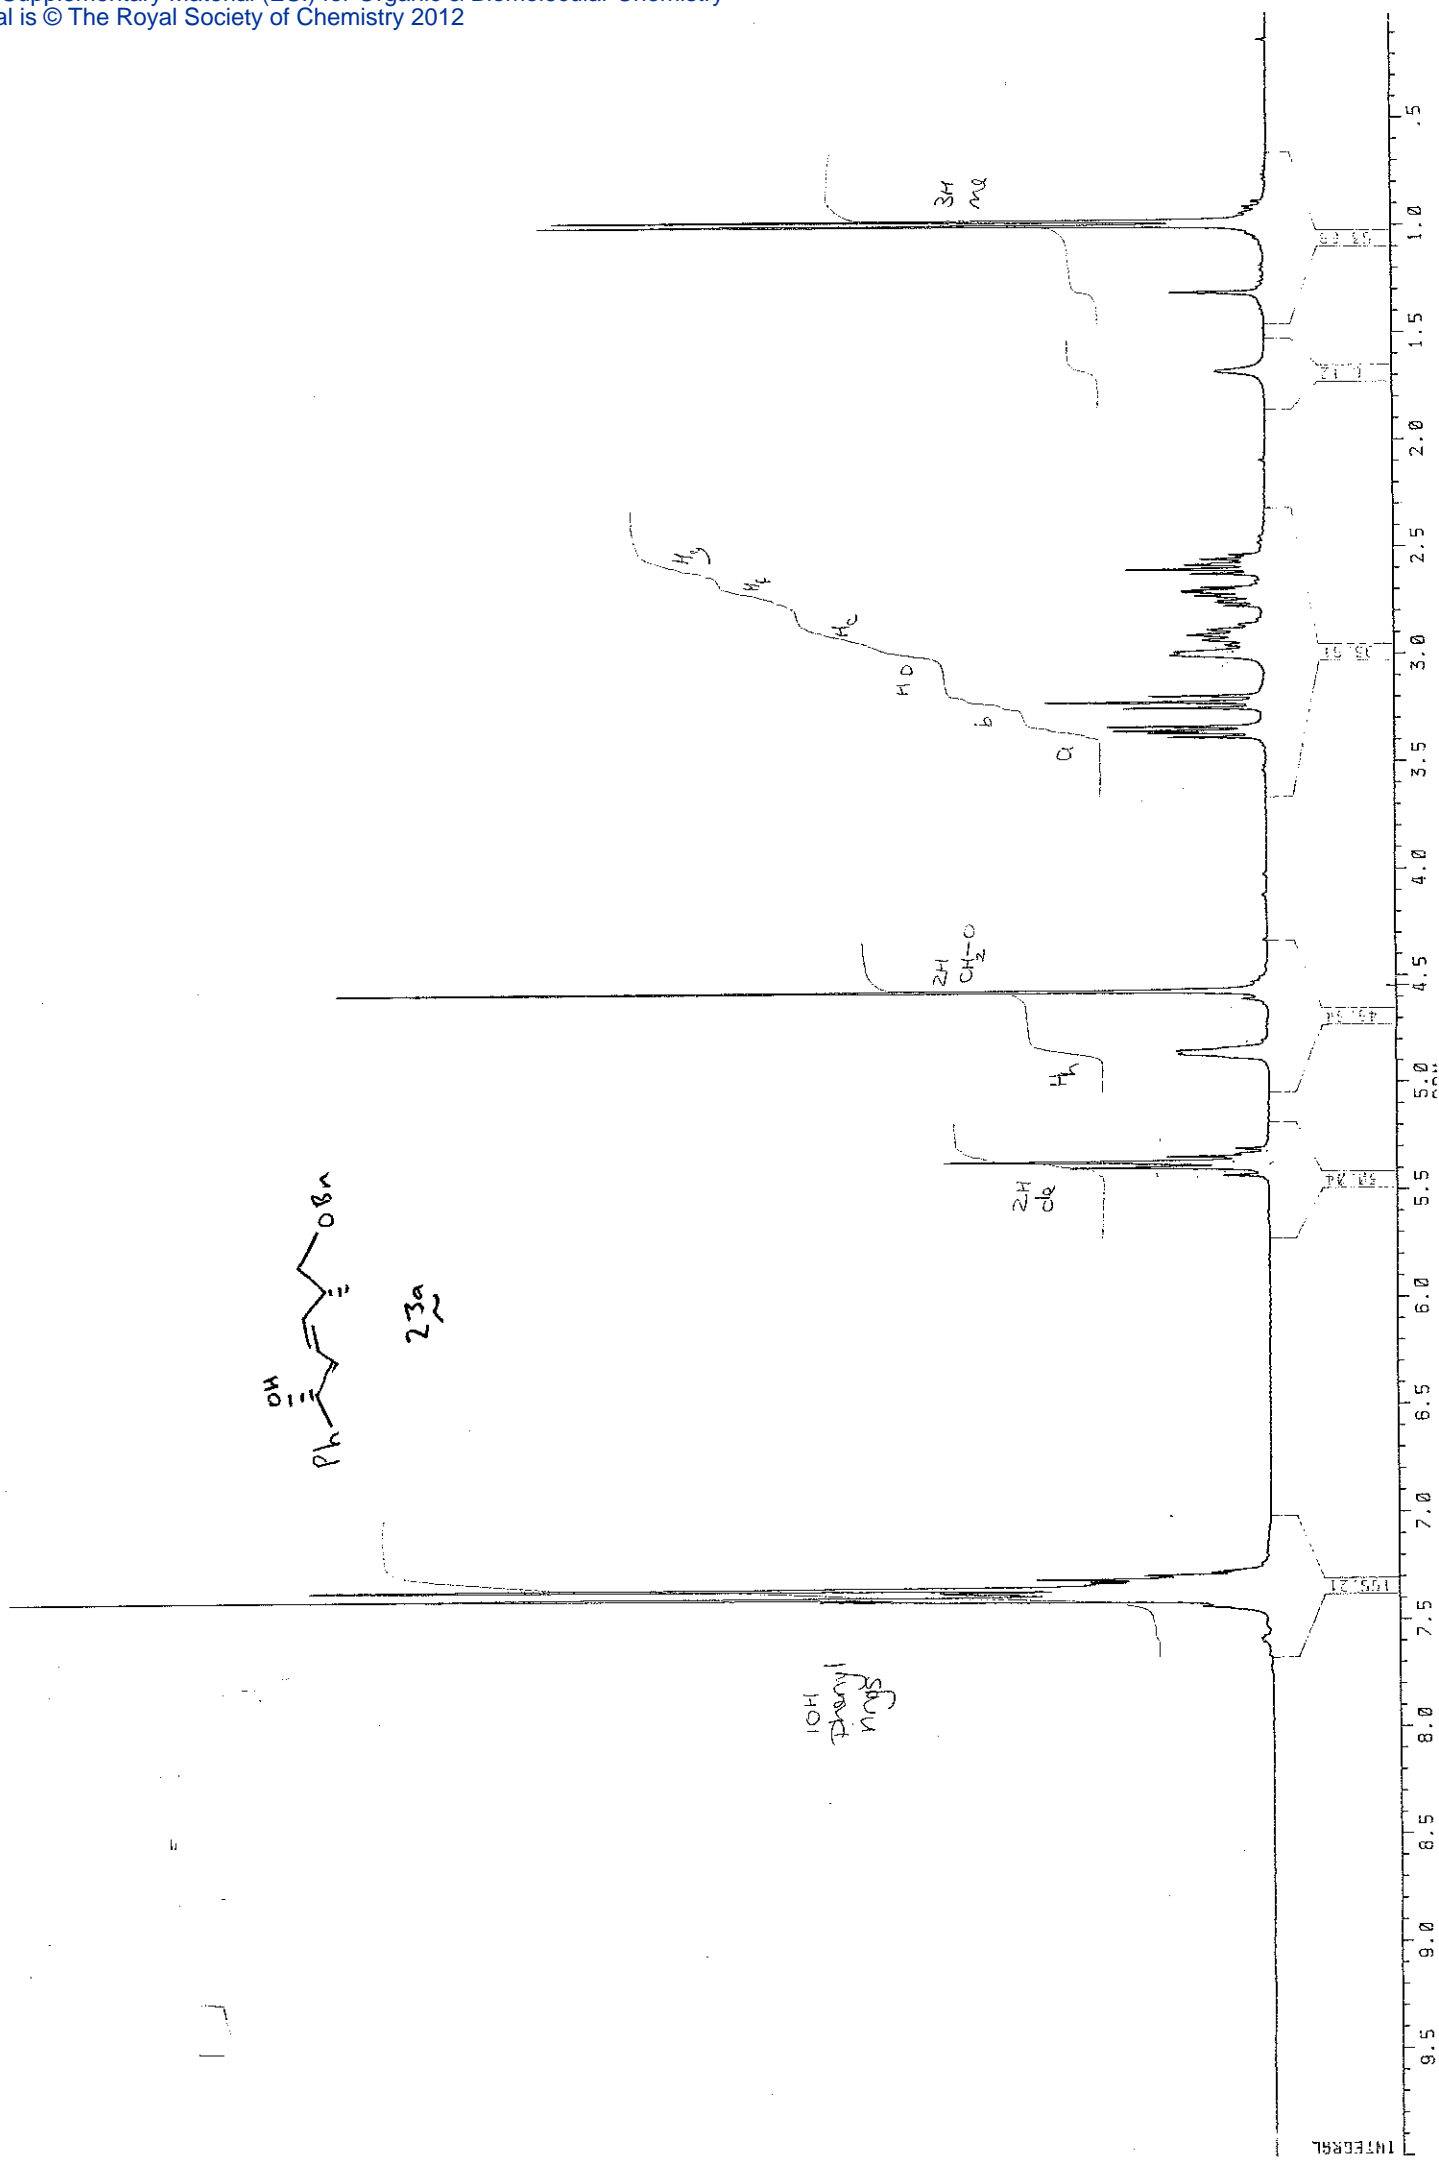

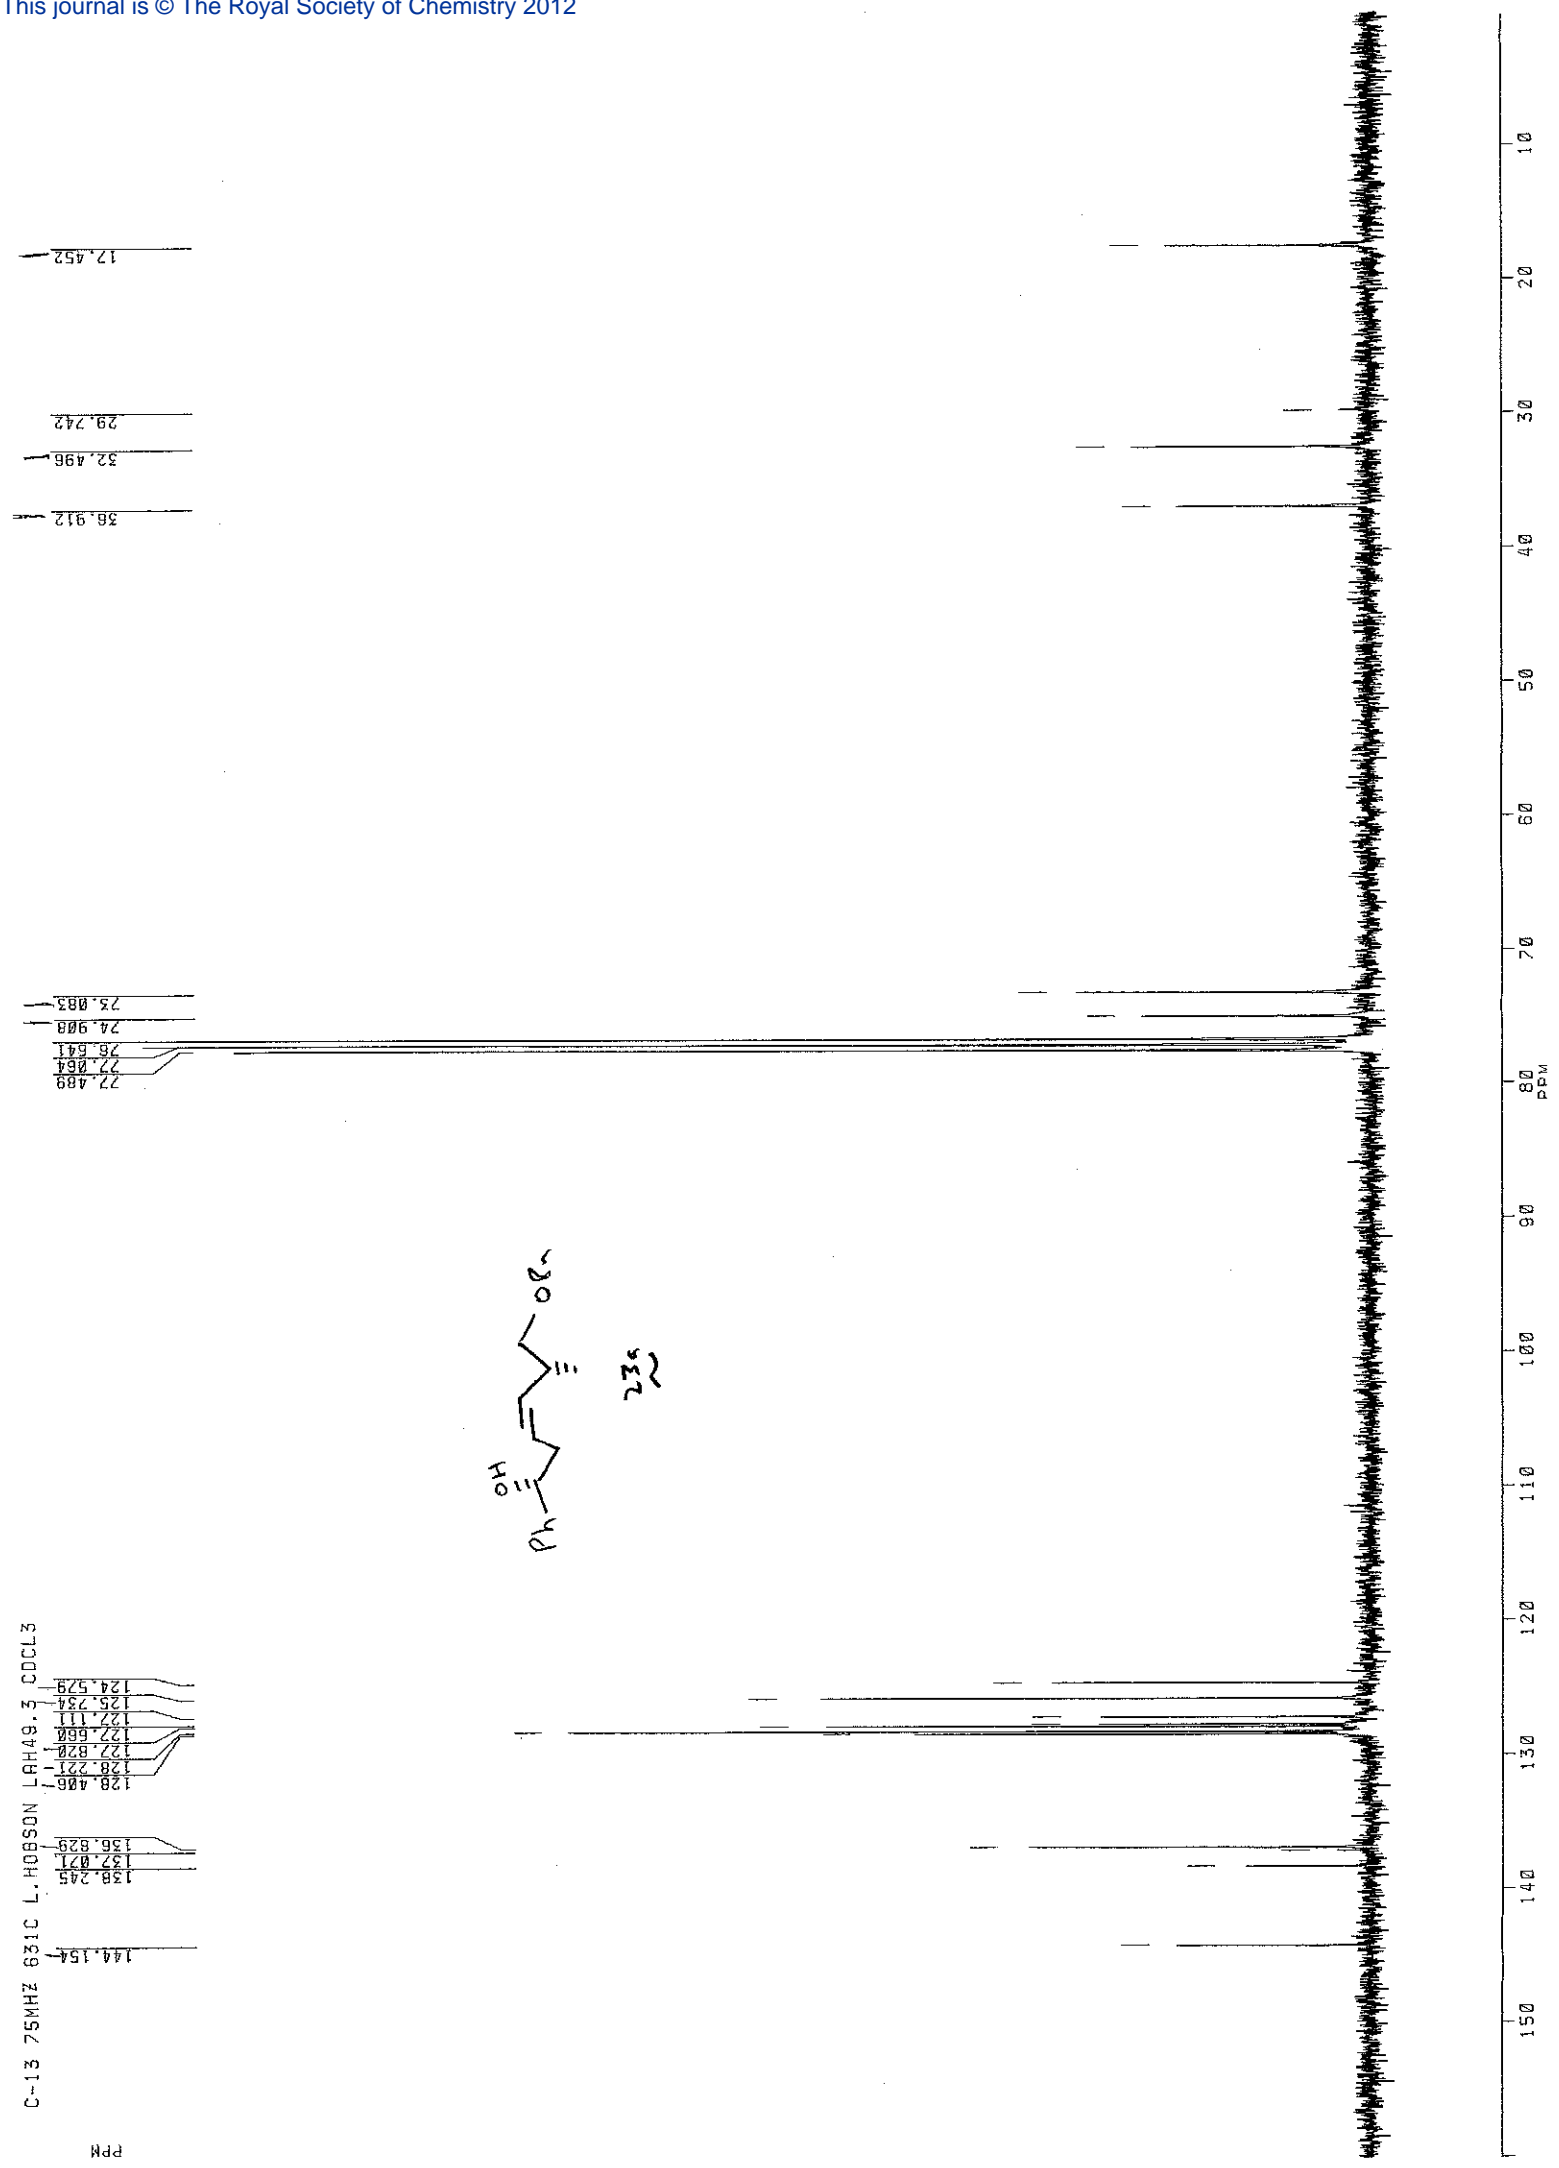

C-13 75MHz 631C L. HOBSON LAH49.3 CDCL3

PPM

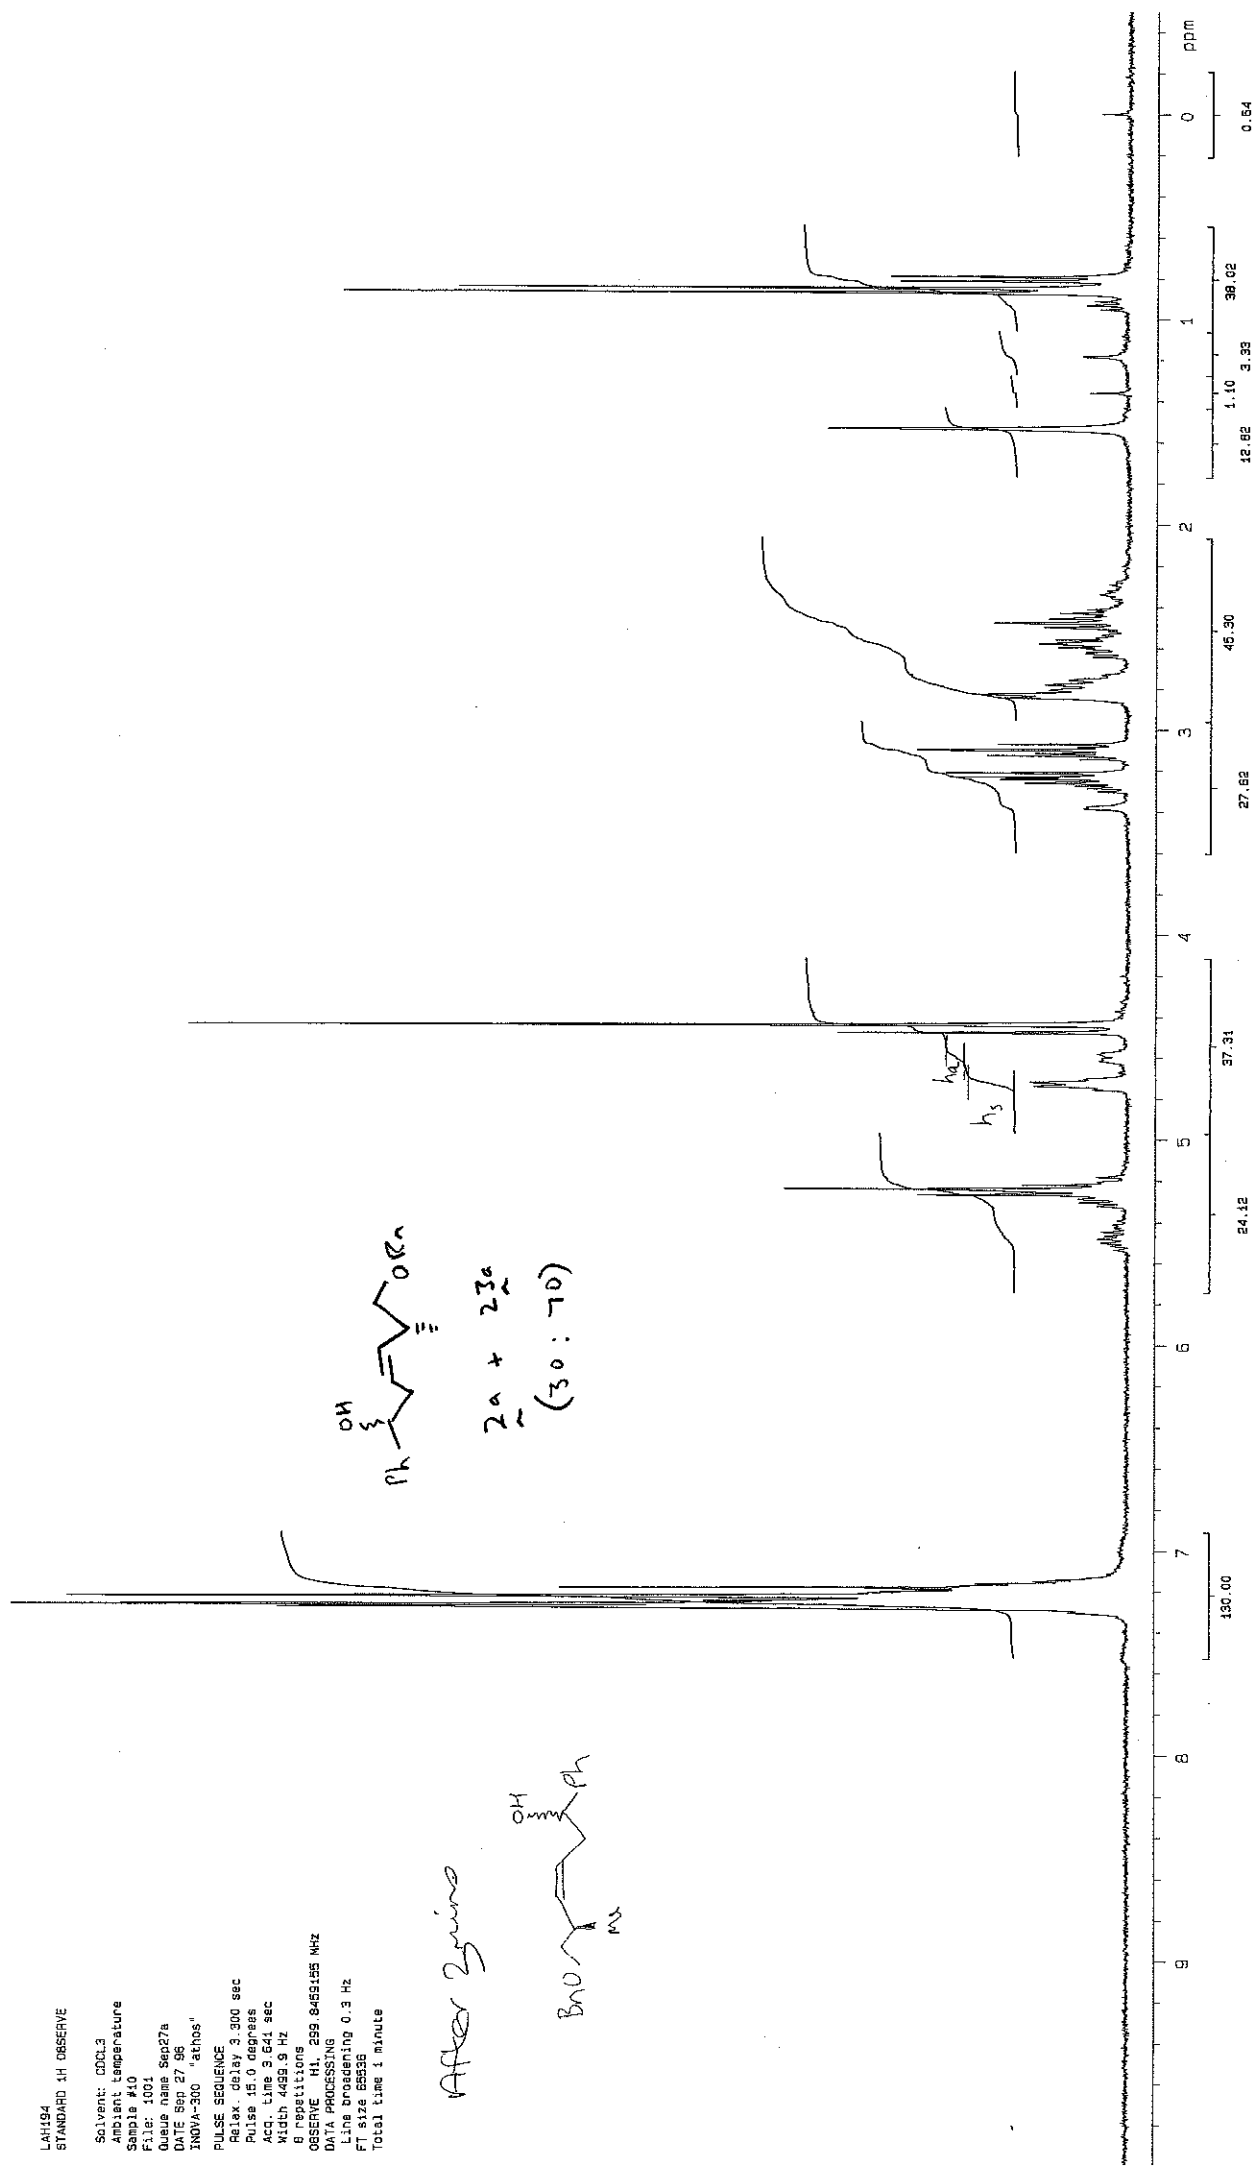

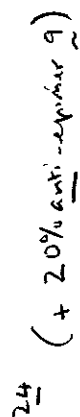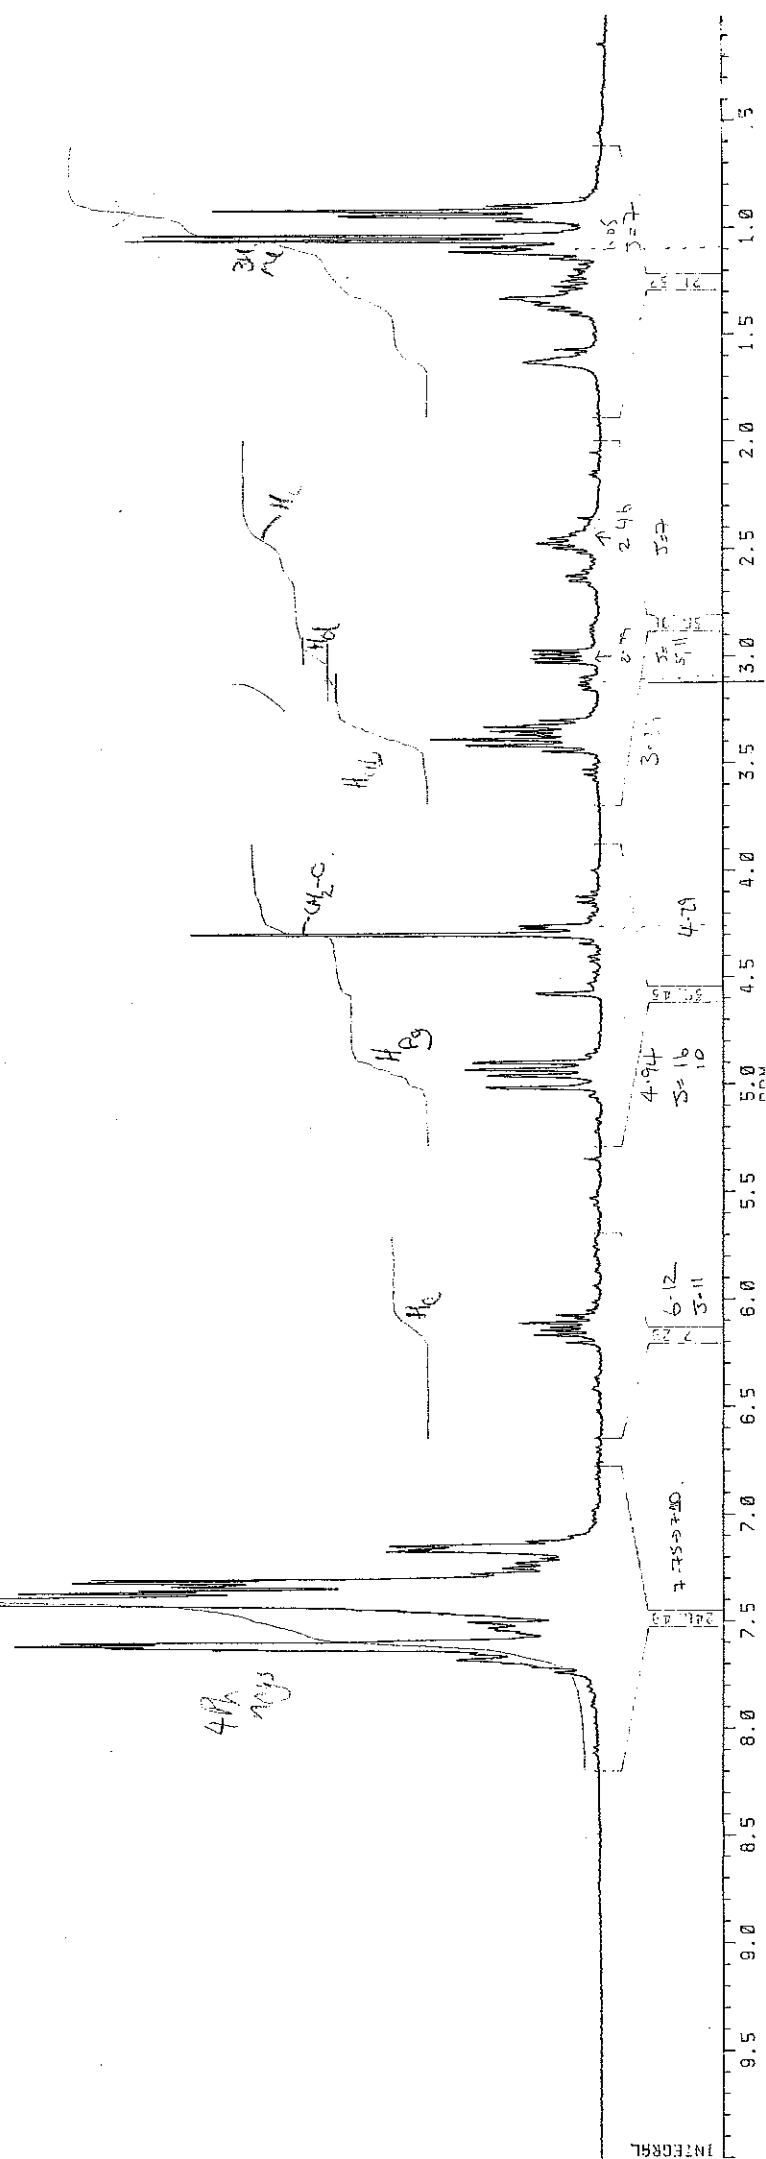

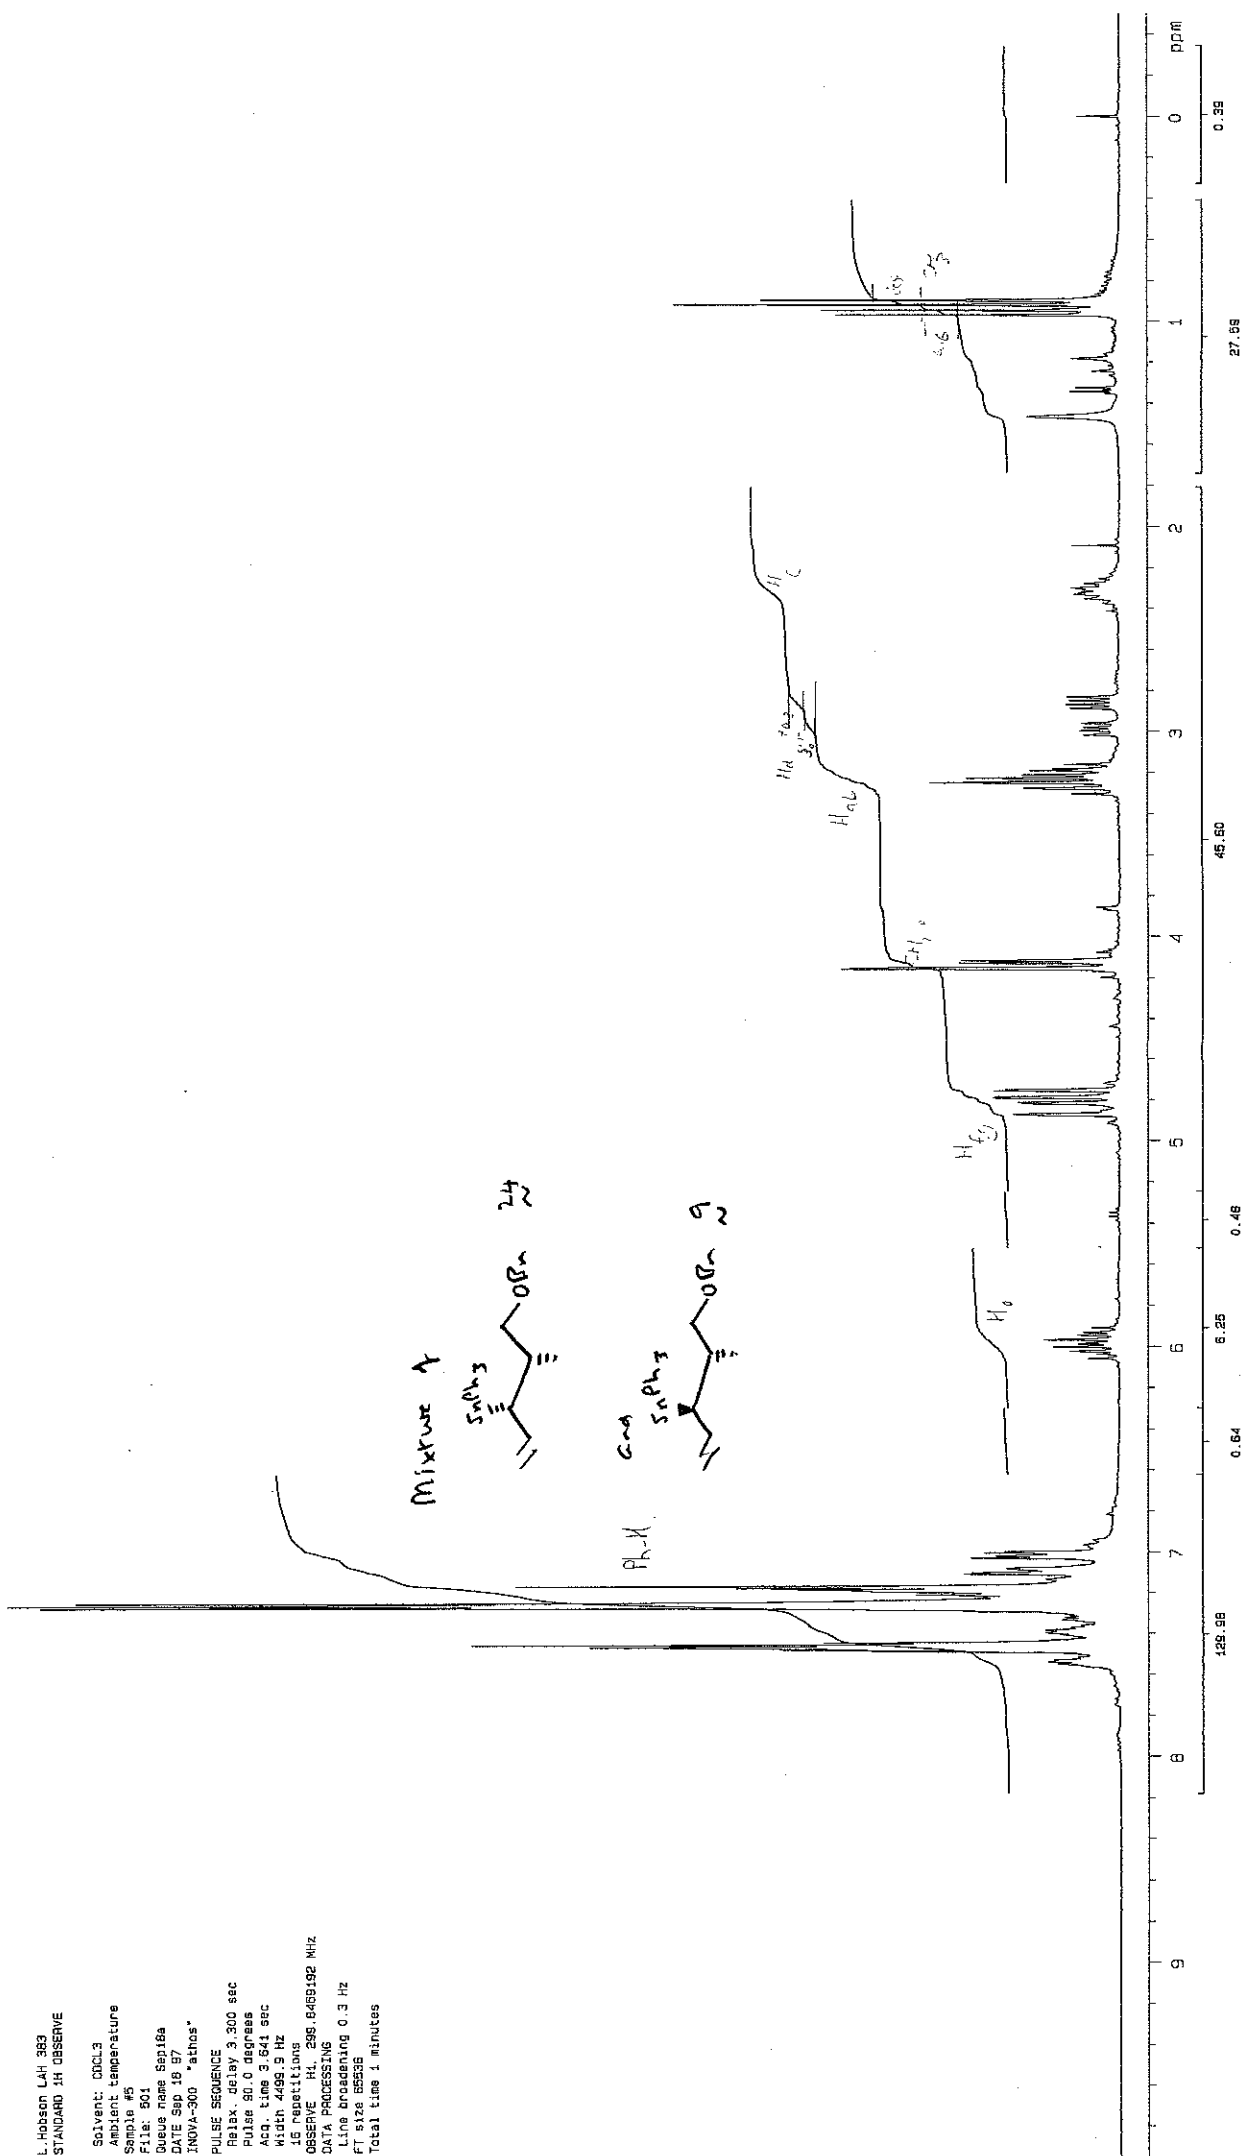

L. Hobson LAH 363  
STANDARD 1H OBSERVE  
Solvent: CDCl<sub>3</sub>  
Acquire temperature: 300 K  
Sample #5  
File: 501  
Queue name: Sep16a  
Date Sep 16 07  
INOVA-300 "atomos"  
PULSE SEQUENCE  
Relax: delay 3.300 sec  
Pulse: 90.0 degrees  
Acq. time 3.641 sec  
Width 4499.9 Hz  
15 repetitions  
OBSERVE H1 299.6468192 MHz  
DATA PROCESSING  
Line broadening 0.3 Hz  
FT size 65536  
Total time 1 minutes

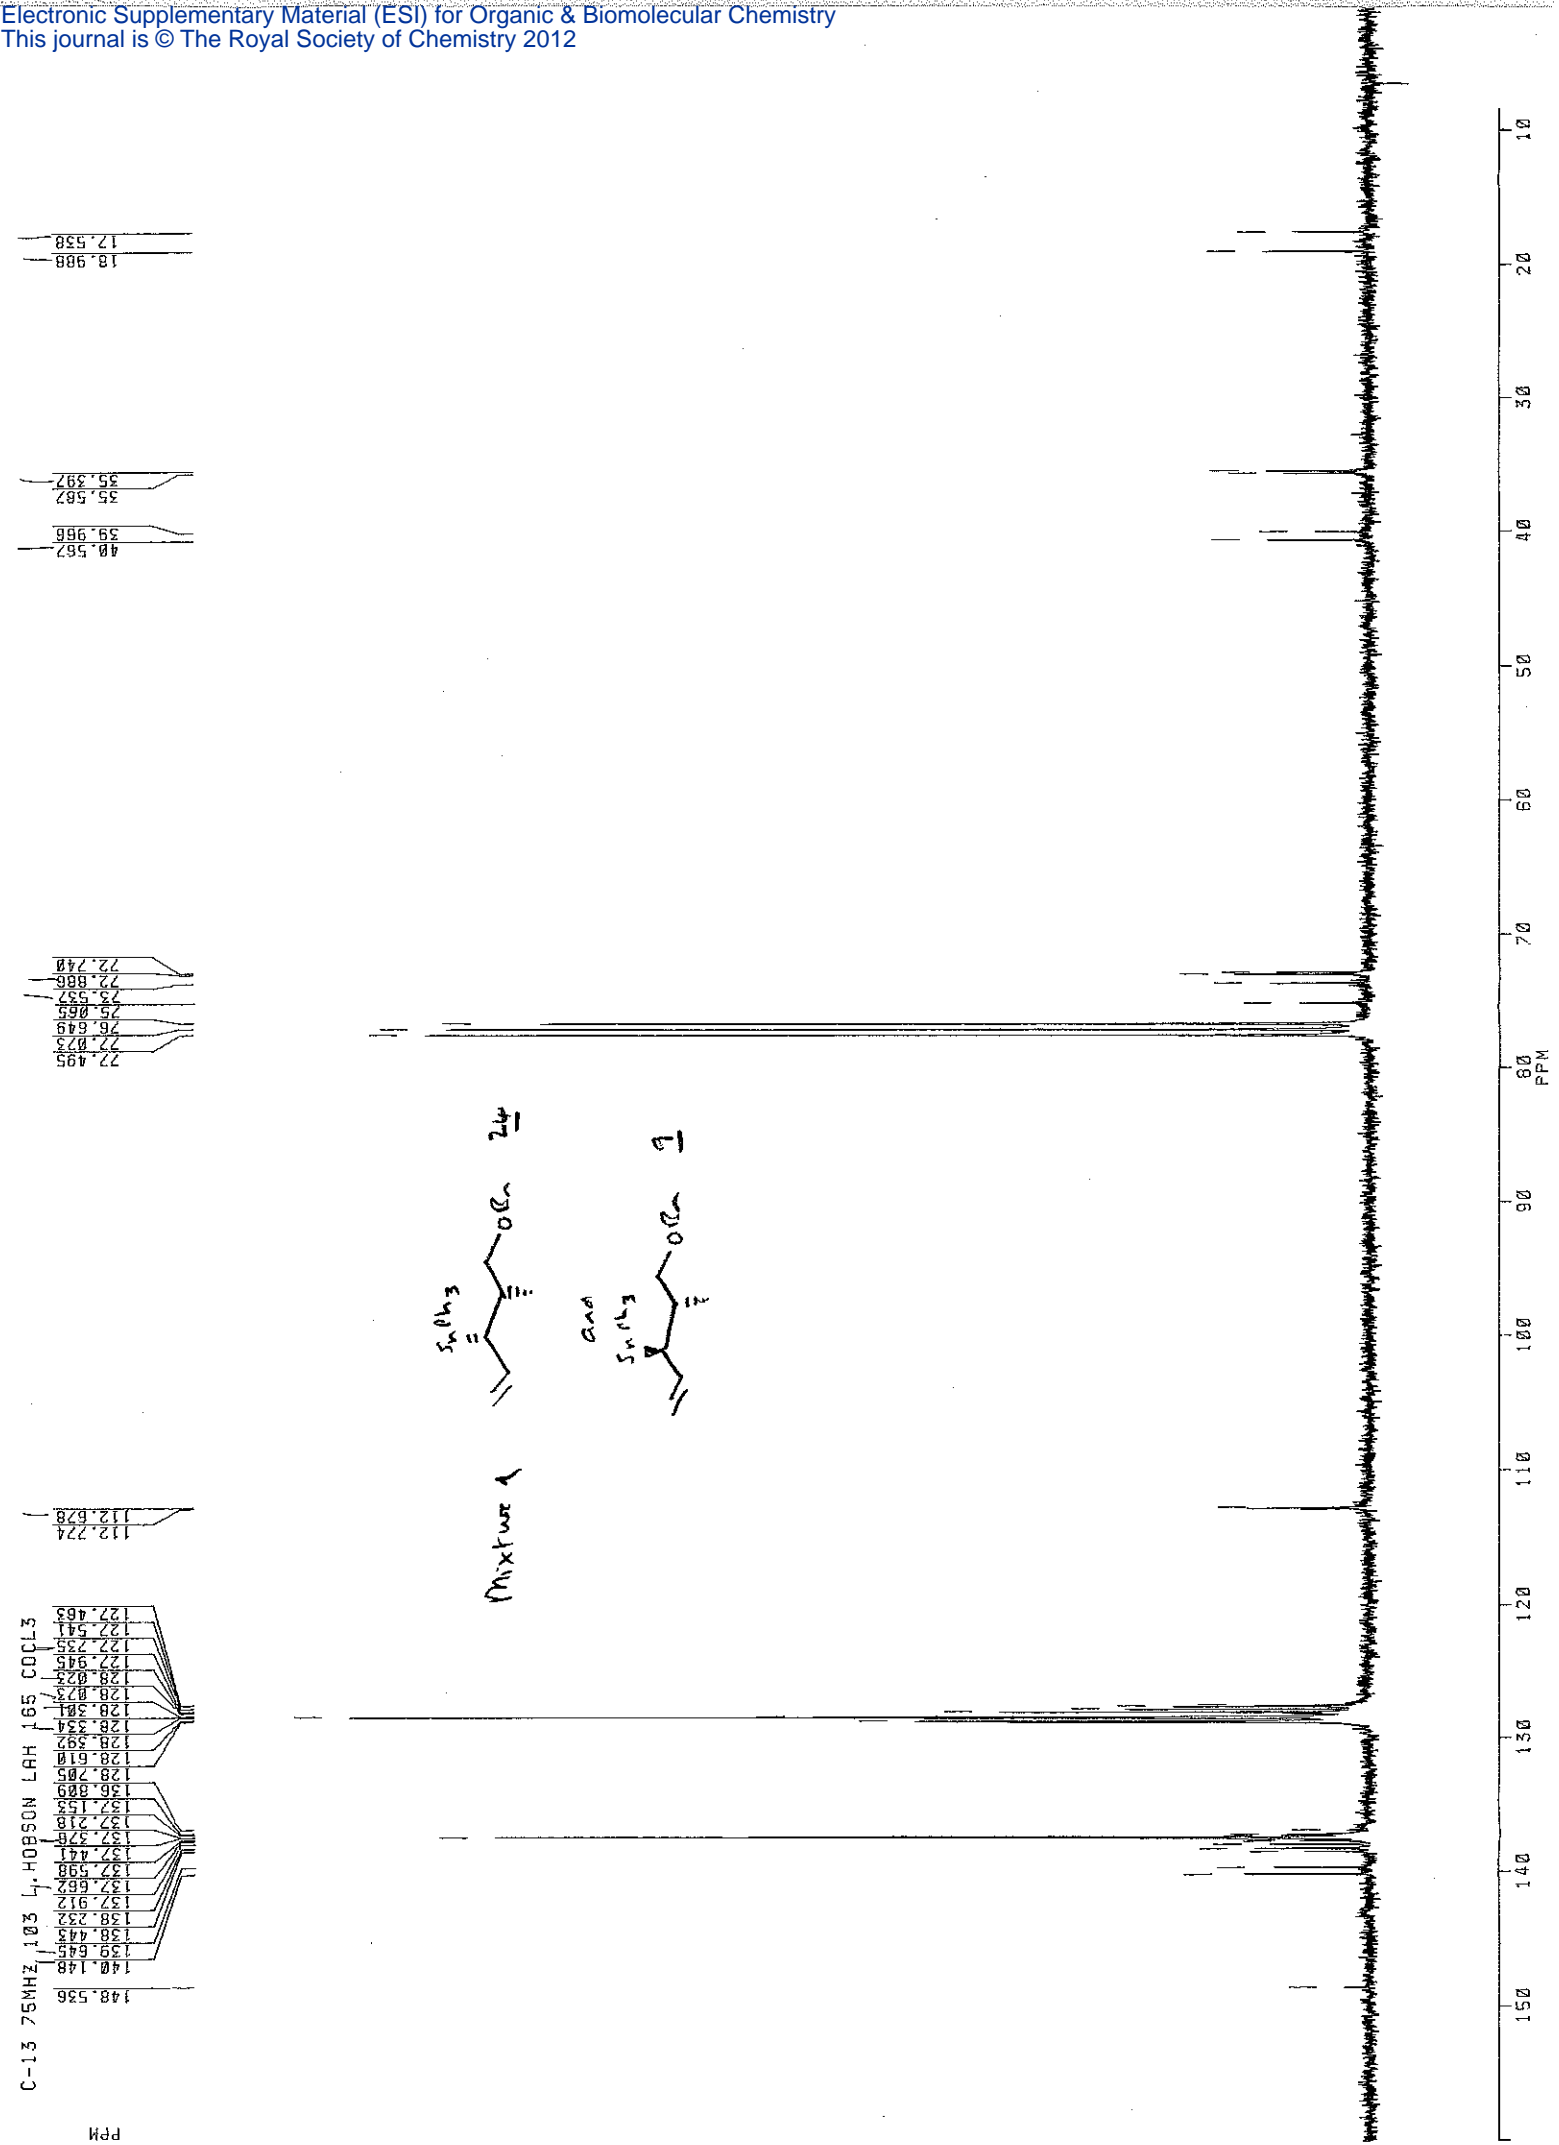

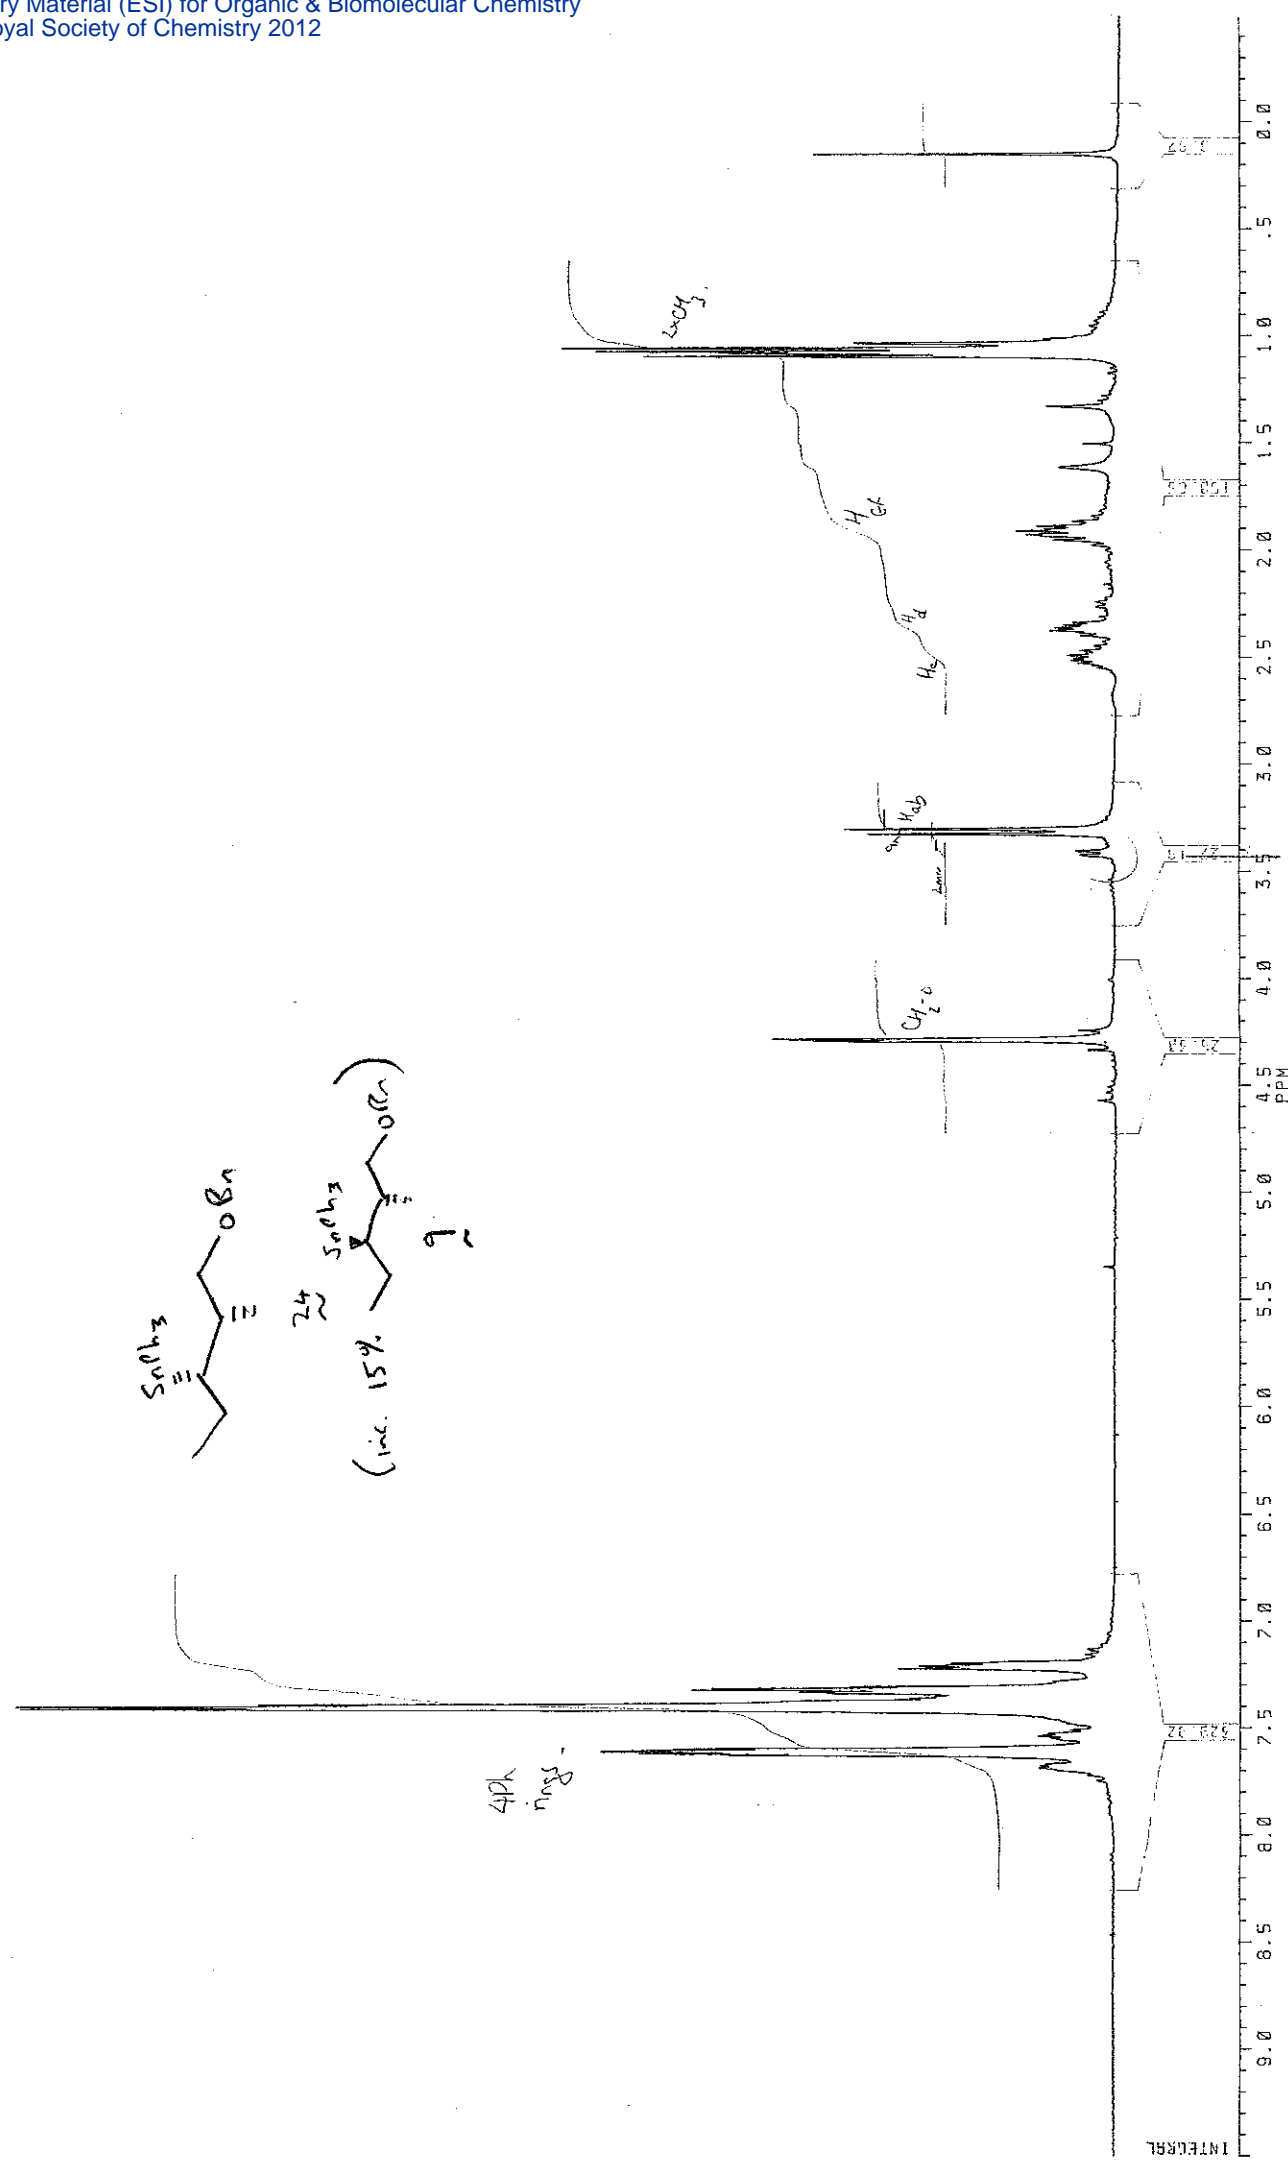

Lindsay Hobson LAH251  
STANDARD 1H OBSERVE

Solvent: CDCl3  
Ambient temperature  
Sample #1  
File: 101  
Queue name Jan22a  
DATE Jan 22 97  
INOVA-300 "athos"

PULSE SEQUENCE  
Relax. delay 3.300 sec  
Pulse 15.0 degrees  
Acq. time 3.641 sec  
Width 4489.9 Hz  
8 repetitions

OBSERVE F1 299.8458793 MHz  
DATA PROCESSING  
Line broadening 0.3 Hz  
FT size 65536  
Total time 1 minute

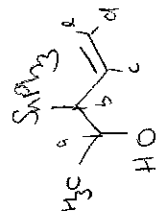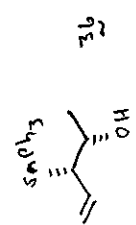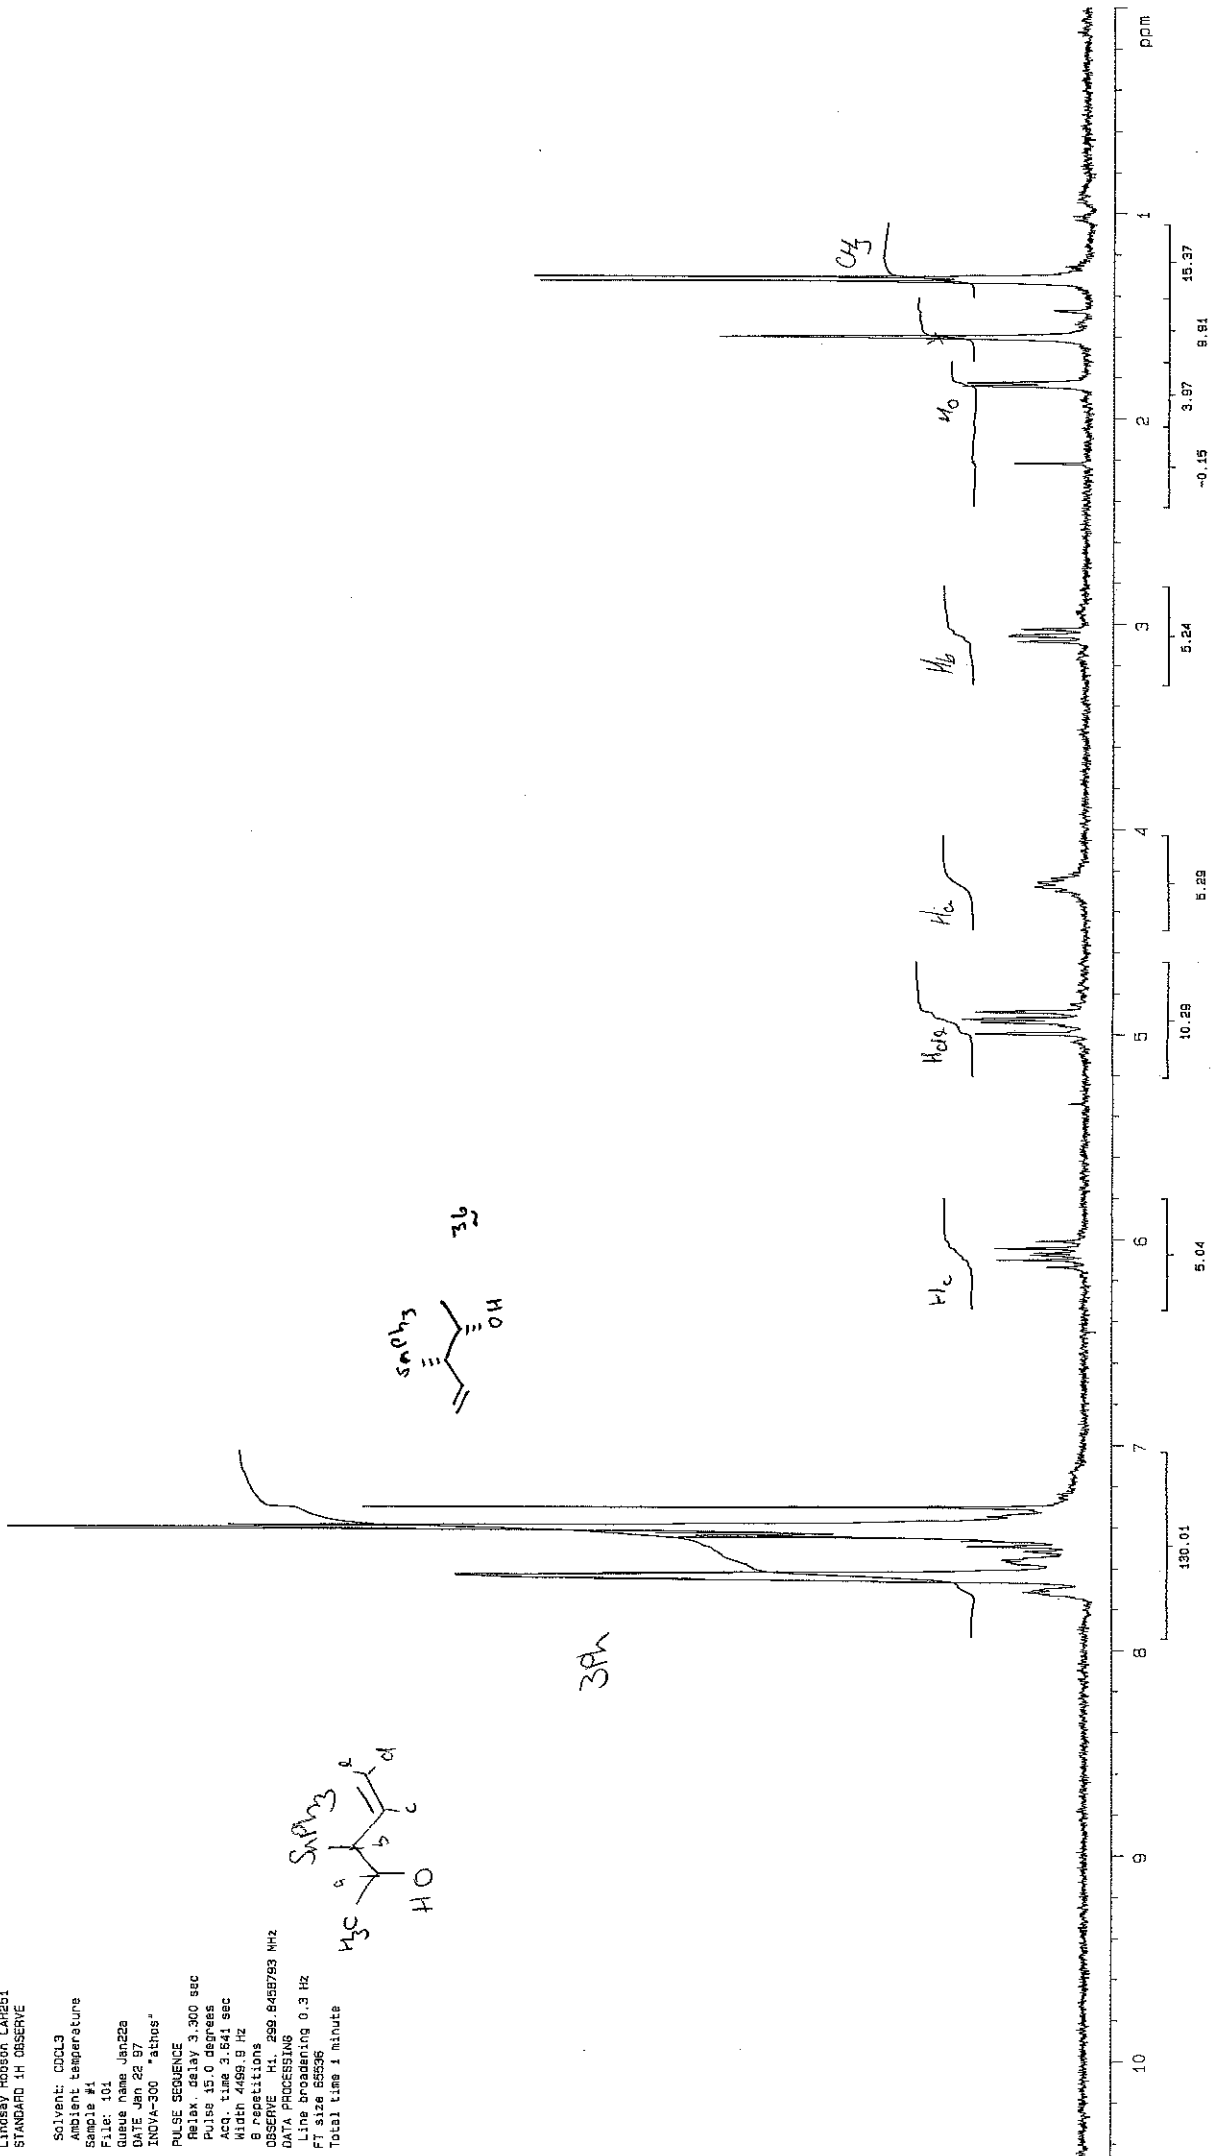



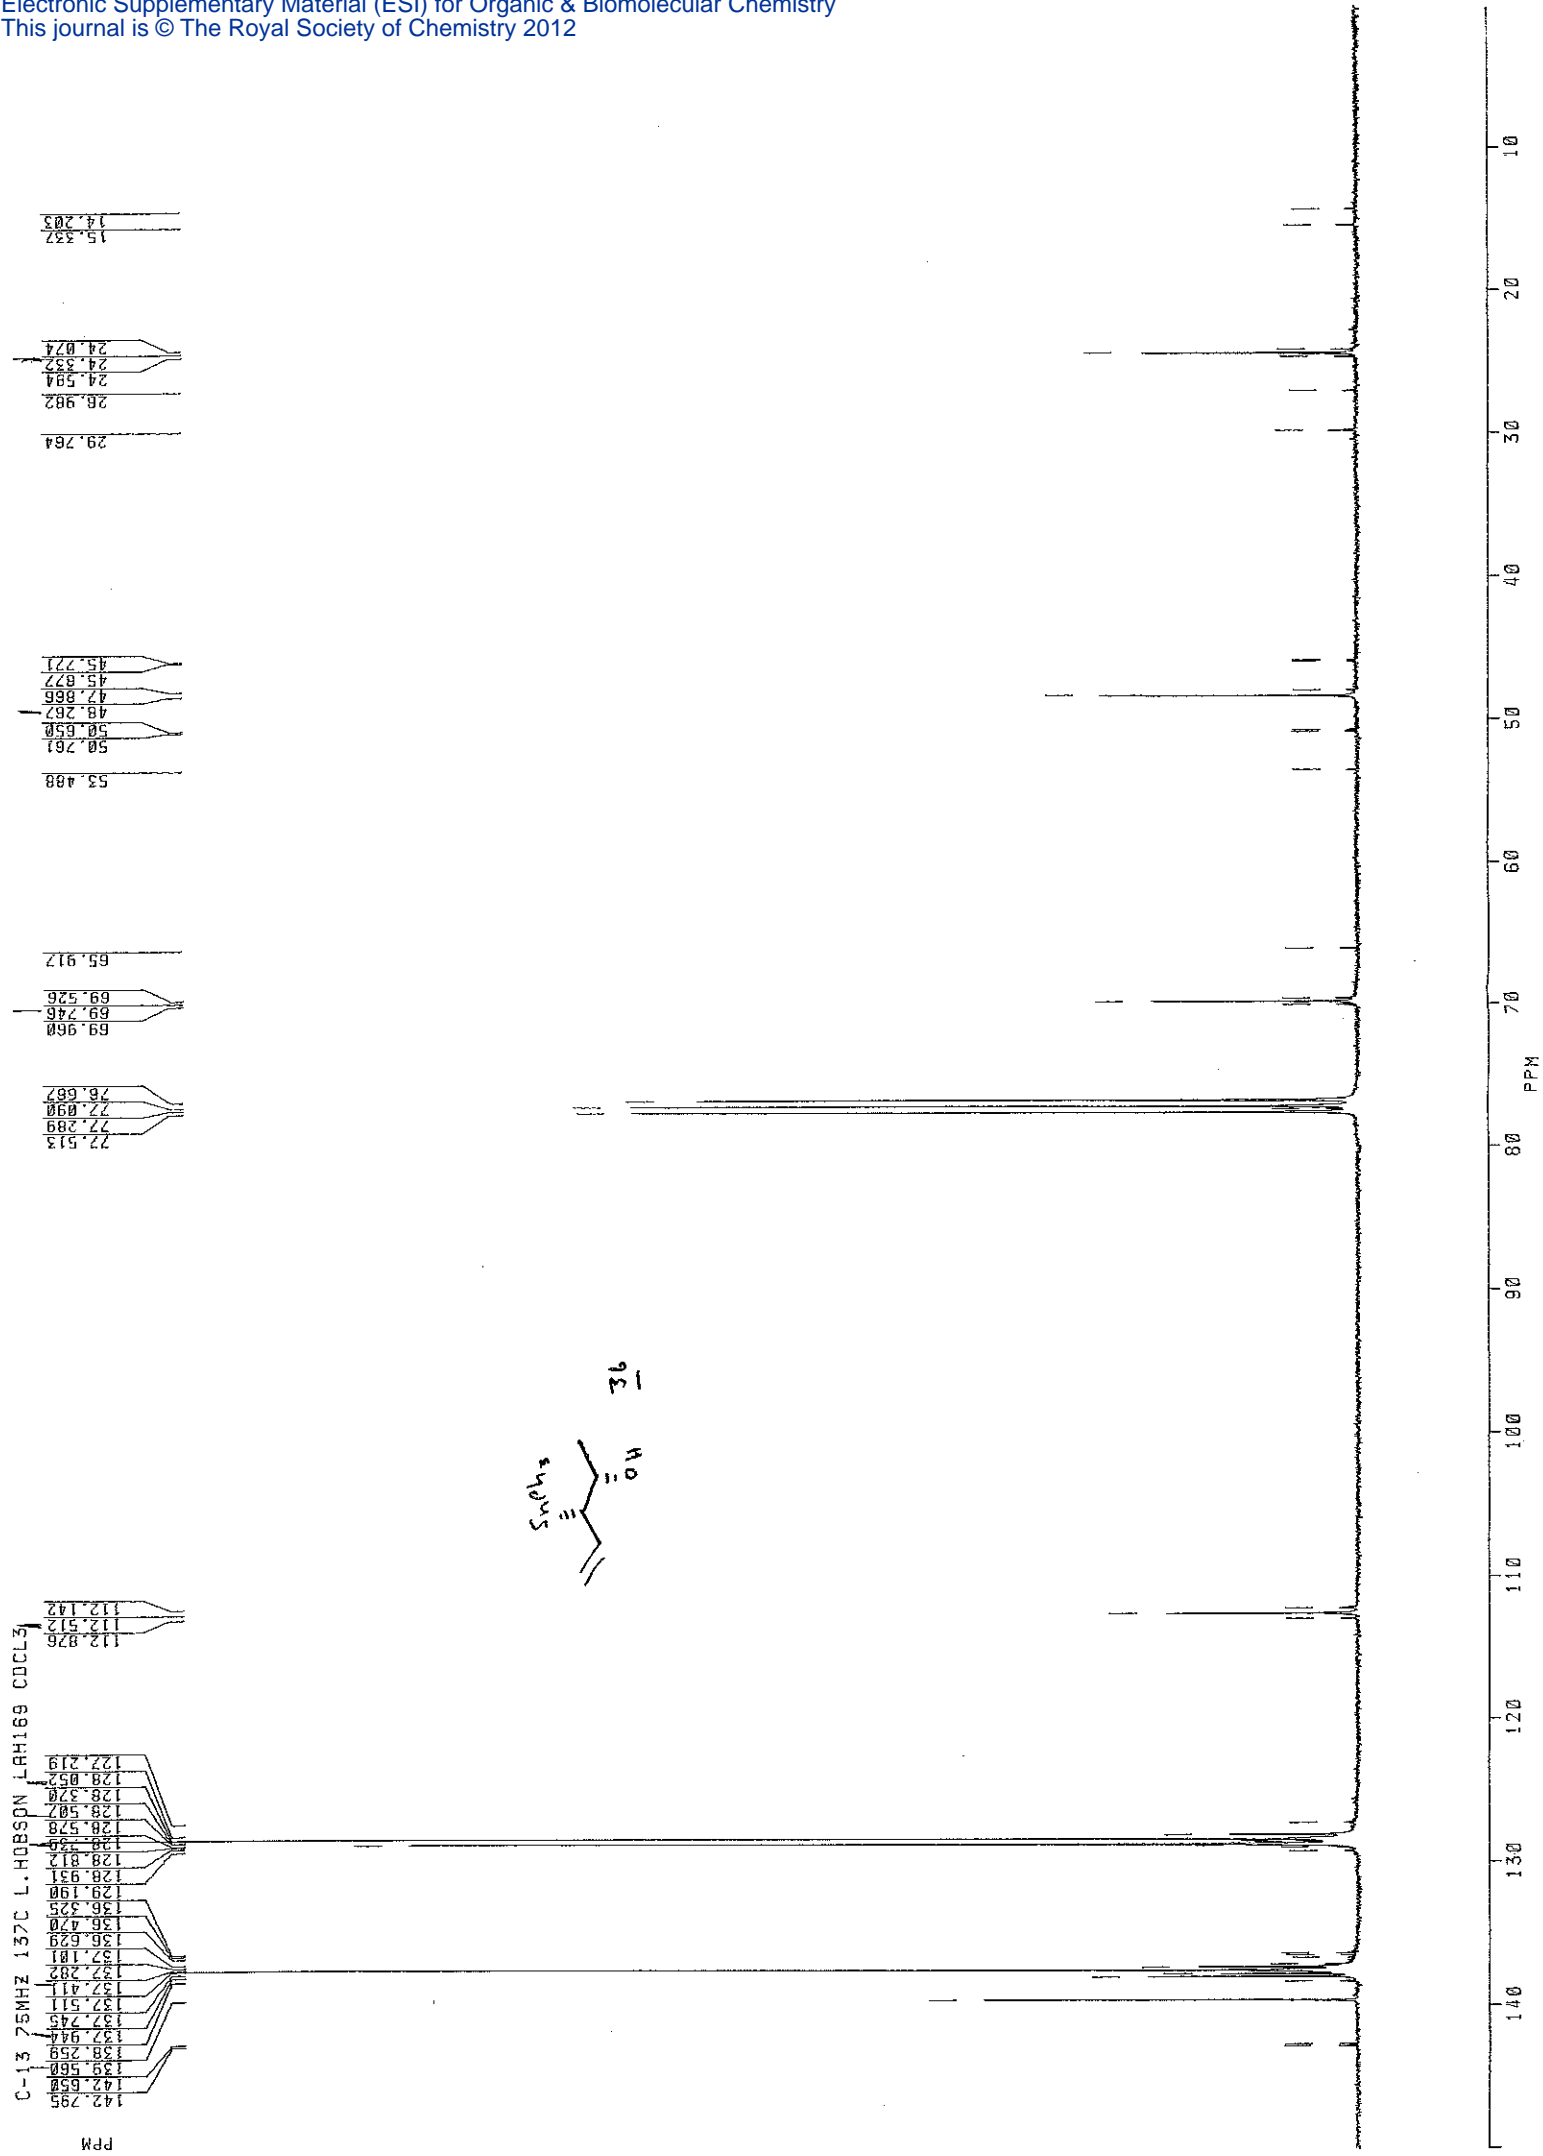

EXPTON 500MHz 95% L-H2O/5% DMSO-LULLS

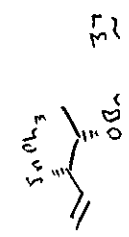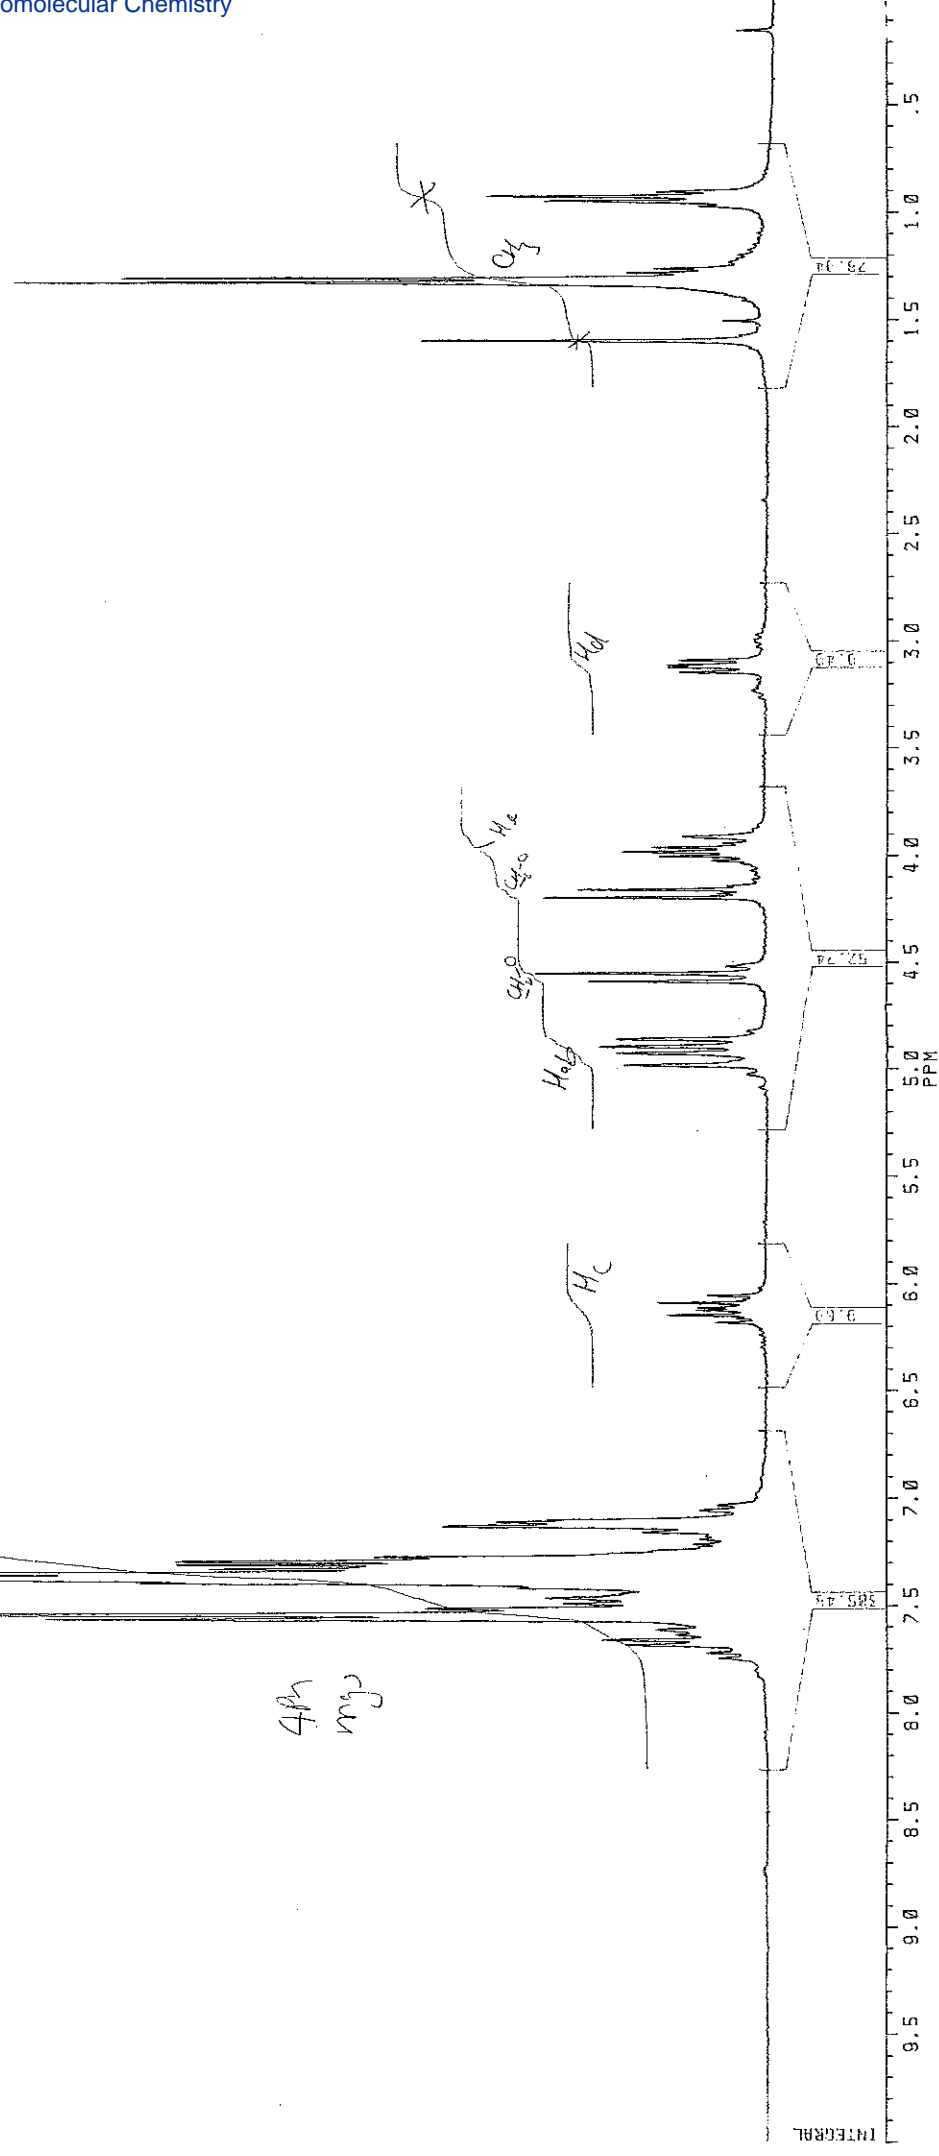

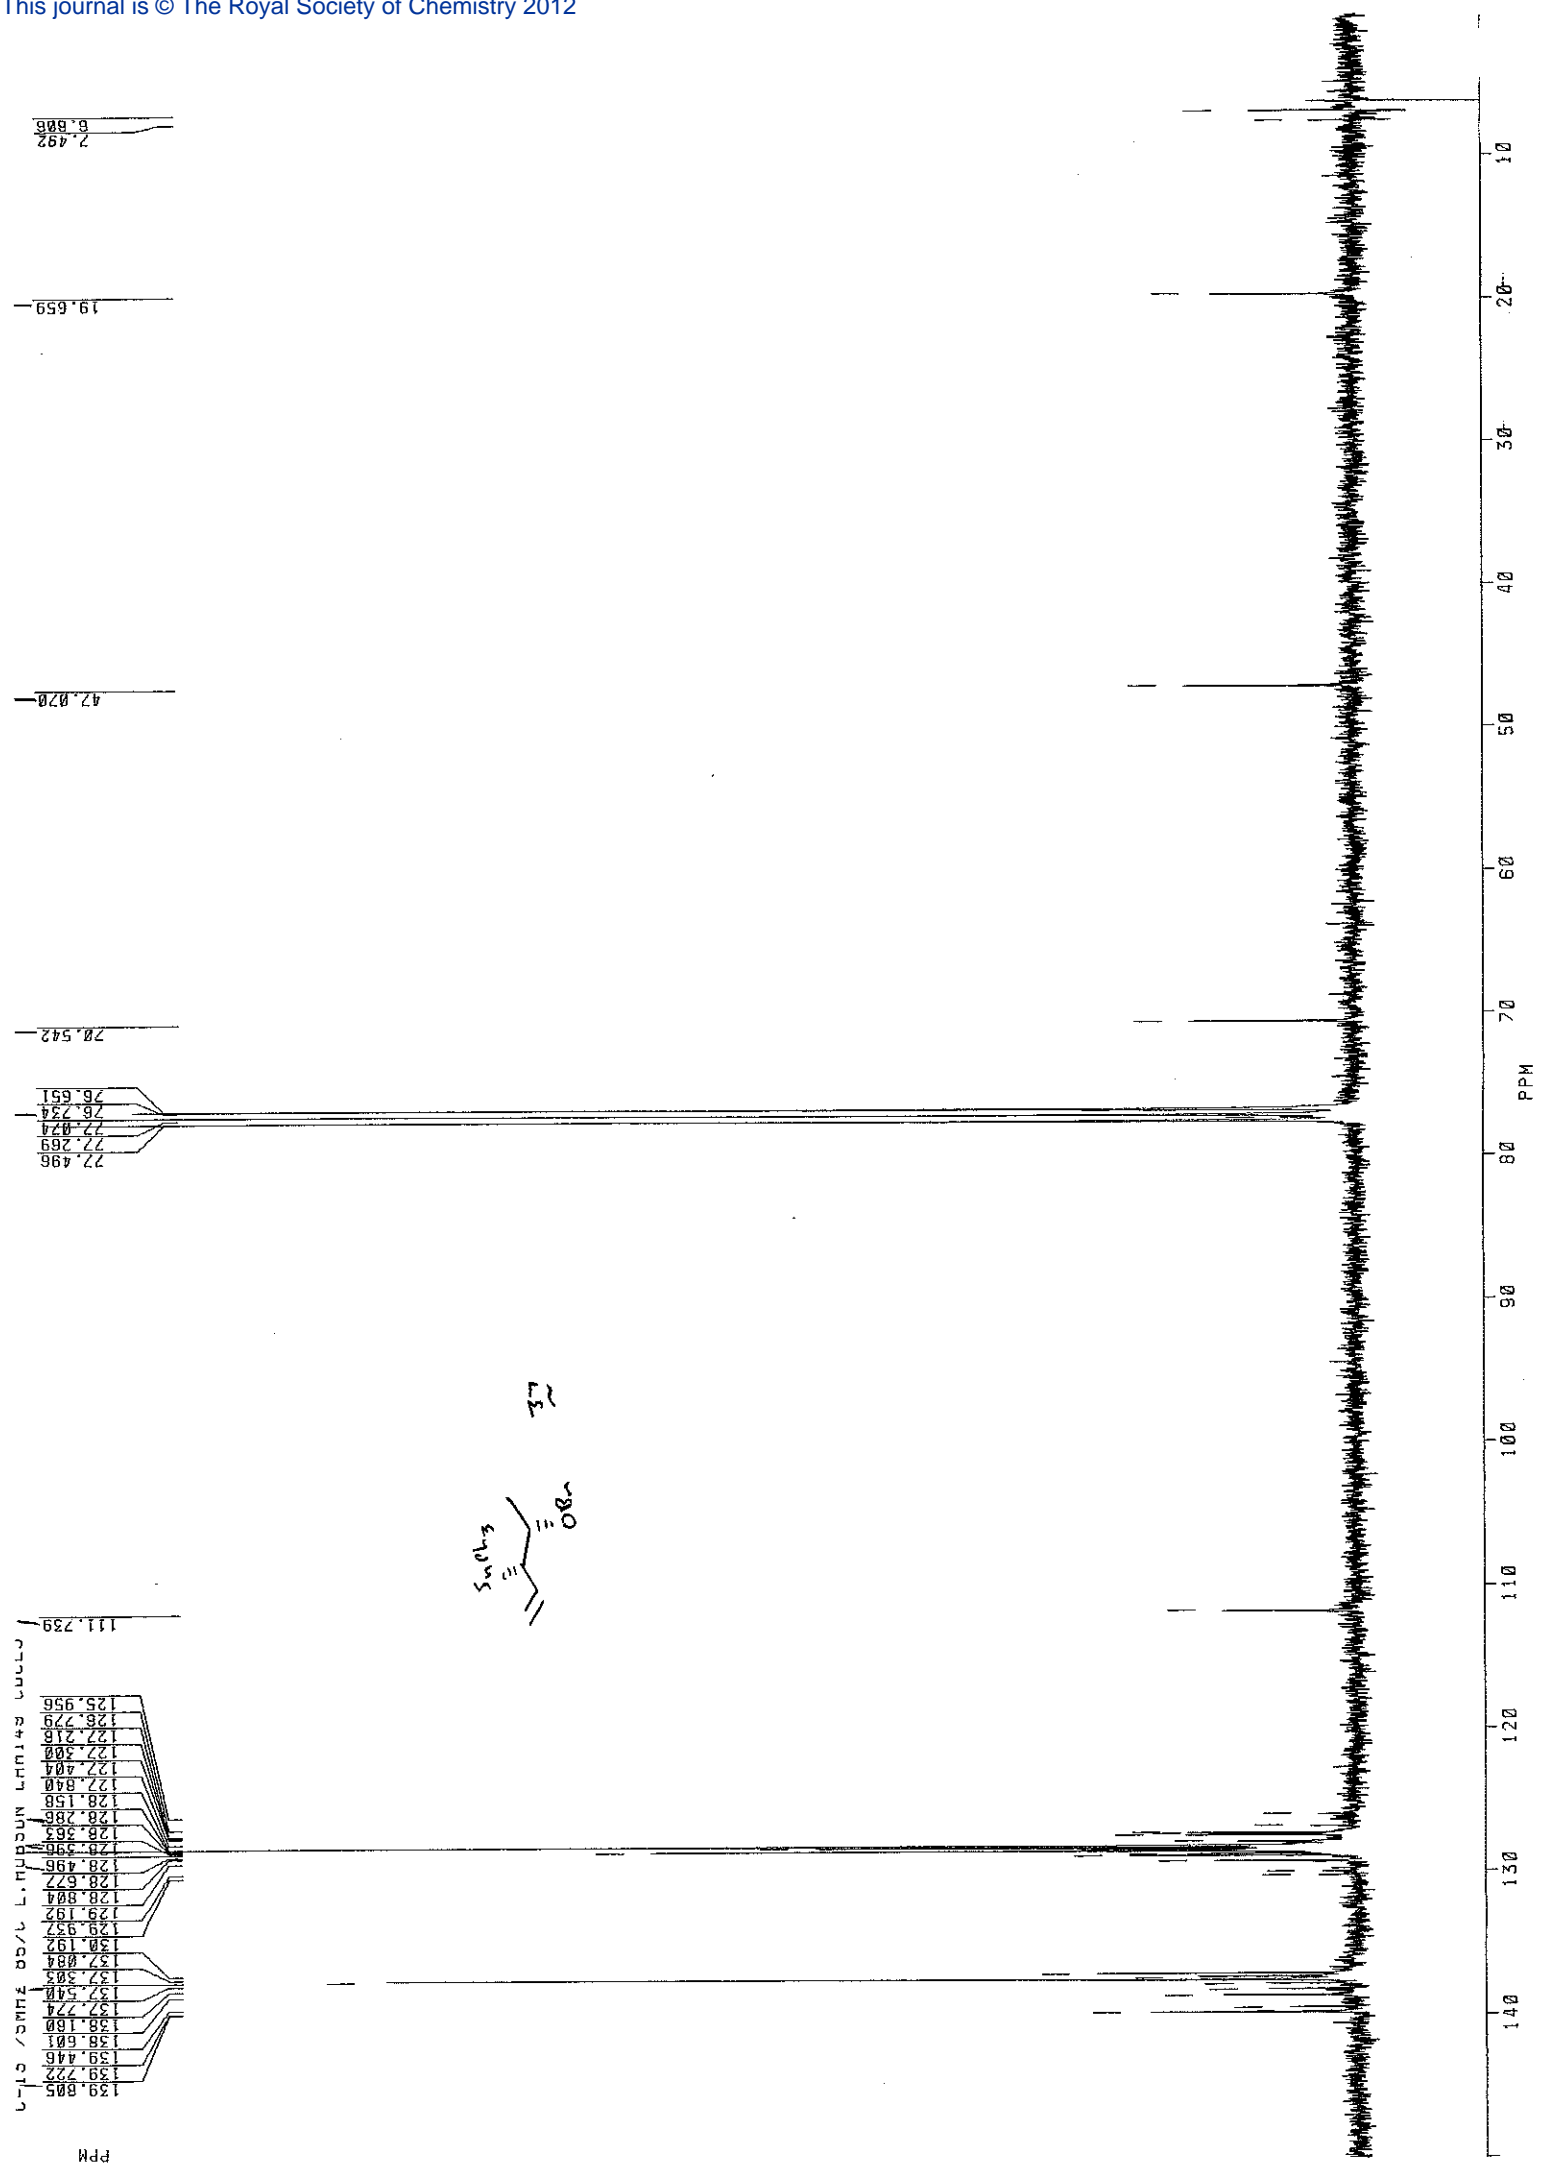

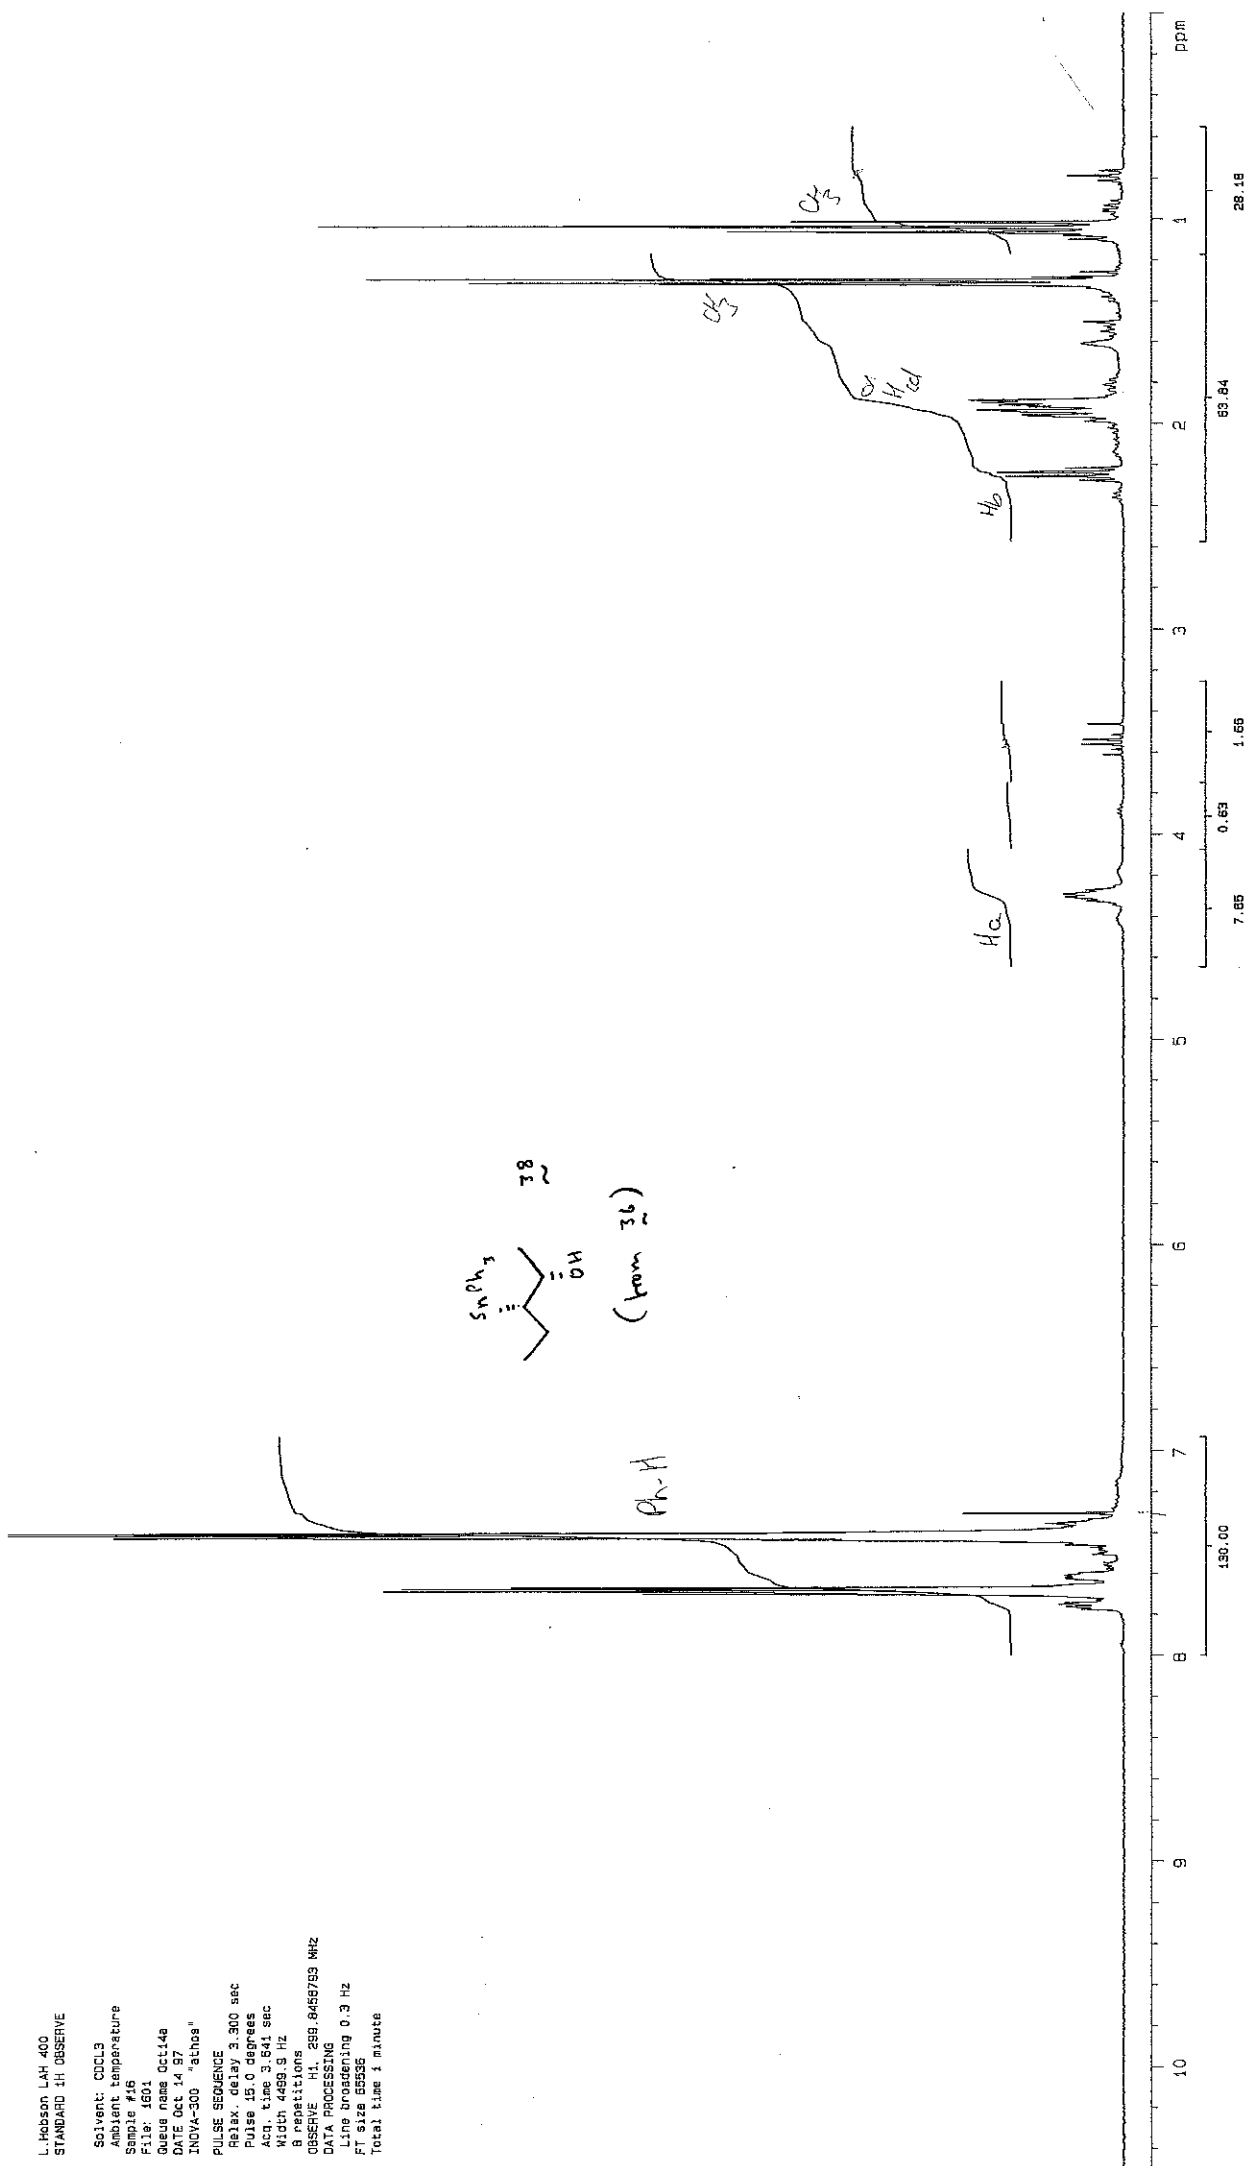

L. Hobson LAH 400  
STANDARD 1H OBSERVE

Solvent: CDCl3  
Ambient temperature

Sample #16

File: 1601

Queue name Oct14e

DATE Oct 14 97

INOVA-300 "athos"

PULSE SEQUENCE

Relax. delay 3.300 sec

Pulse 15.0 degrees

Acq. time 3.641 sec

Width 4589.9 Hz

8 repetitions

OBSERVE H1, 299.8456789 MHz

DATA PROCESSING

Line broadening 0.3 Hz

FI size 65536

Total time 1 minute

L. Hobson LAM 400  
STANDARD 1H OBSERVE

Solvent: CDCl3  
Ambient temperature  
Sample #16  
File: 1602  
Queue name Oct14a  
DATE Oct 14 97  
INOVA-300 "athos"

PULSE SEQUENCE  
Pulse 45.0 degrees  
Acq. time 1.558 sec  
Width 20000.0 Hz  
112 repetitions

OBSERVE C13, 75.365141 MHz  
DECOUPLE H1, 299.8473785 MHz  
Power 40 dB  
continuously on

WALTZ-16 modulated  
DATA PROCESSING  
Line broadening 1.0 Hz  
FT size 65536  
Total time 3 minutes

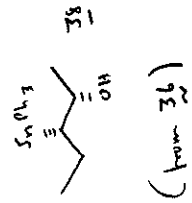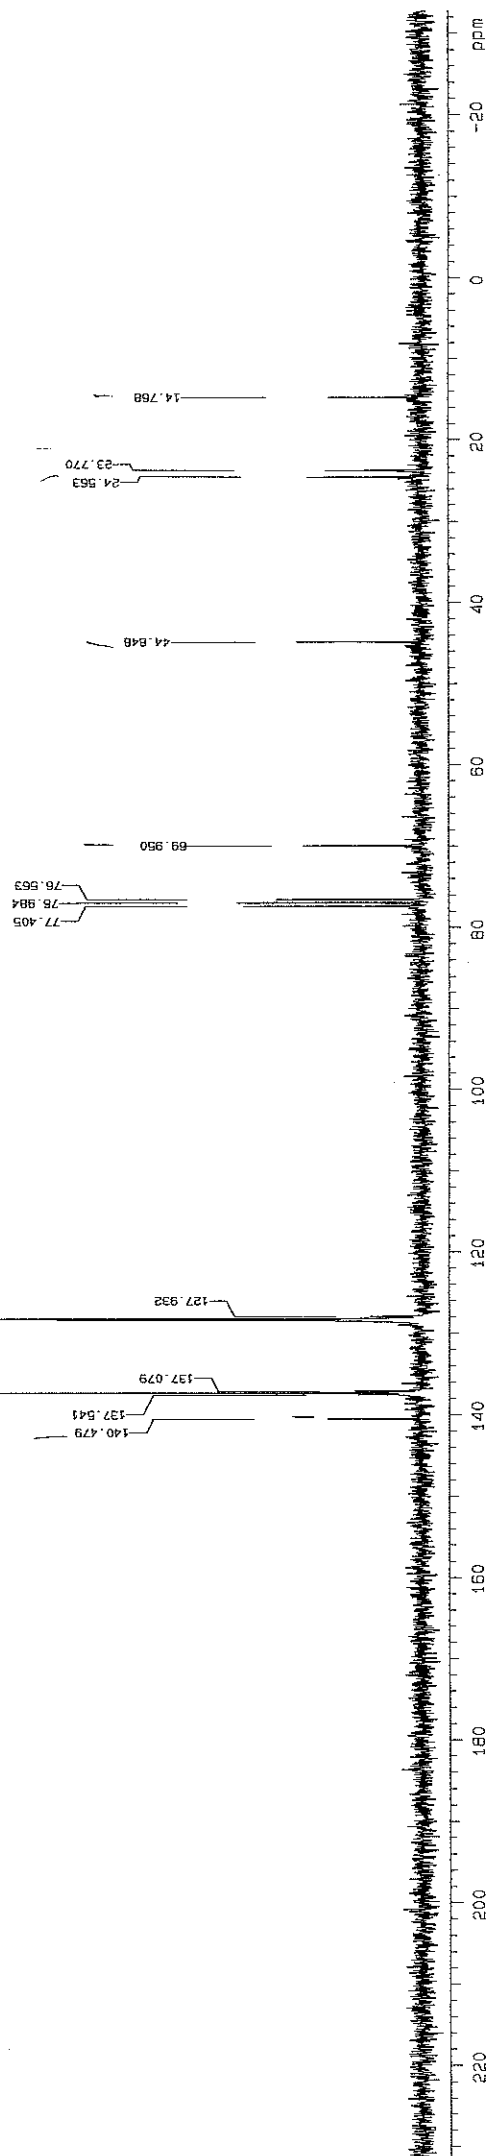

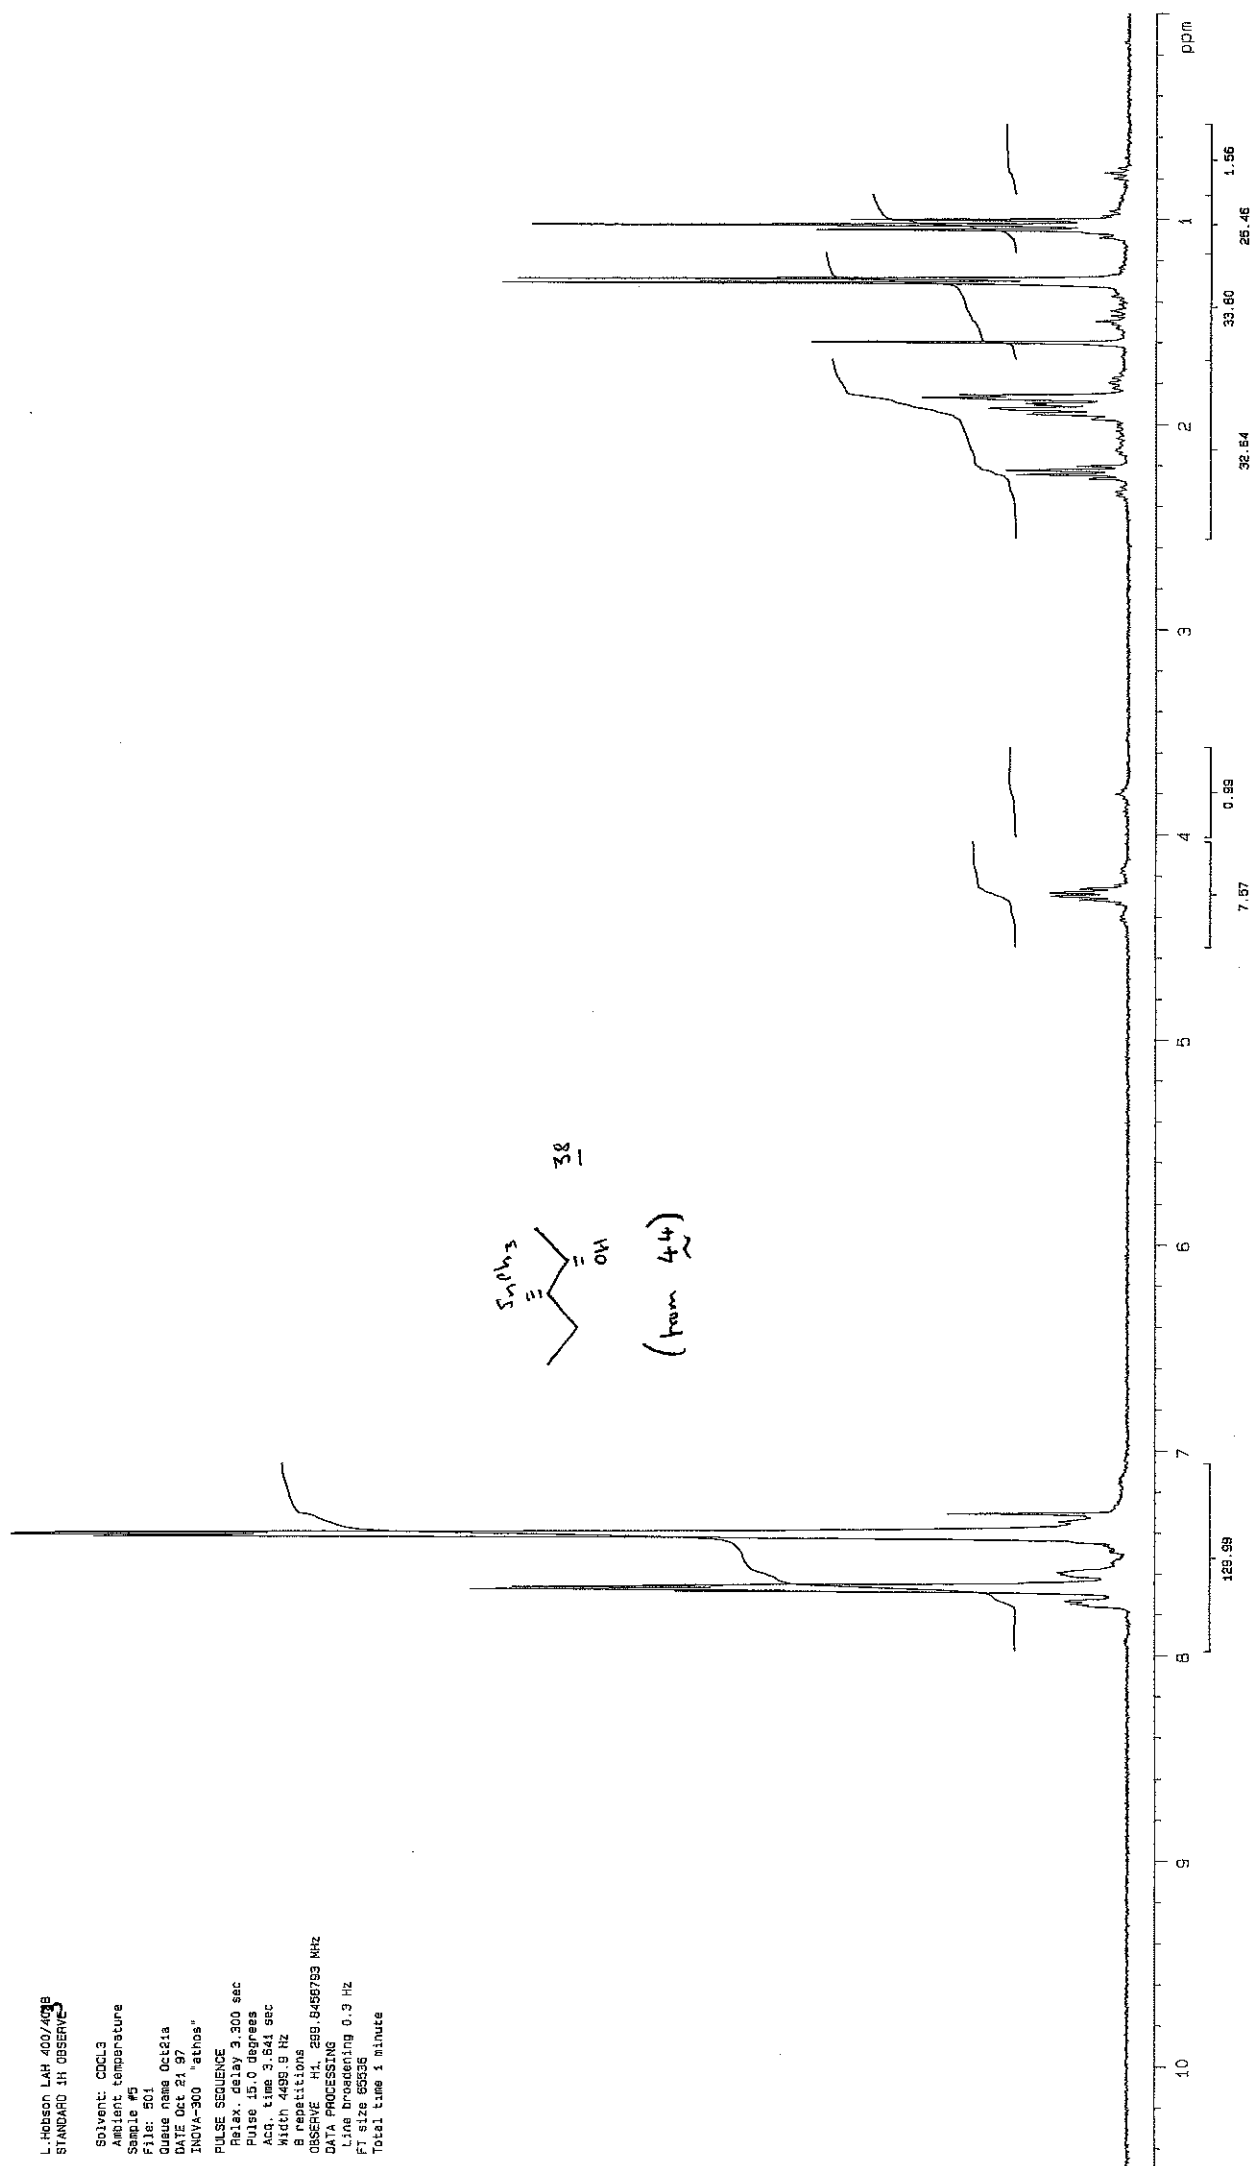

L. Hobson LAH 400/400B  
STANDARD 1H OBSERVE

Solvent: CDCl<sub>3</sub>  
Ambient temperature  
Sample #5  
File: 501  
Queue name Oct21a  
DATE Oct 21 97  
INOVA-300 "athos"

PULSE SEQUENCE  
Relax. delay 3.300 sec  
Pulse 15.0 degrees  
Acq. time 3.641 sec  
Width 4496.9 Hz  
8 repetitions

OBSERVE H1 299.8456793 MHz  
DATA PROCESSING  
Line broadening 0.3 Hz  
FI size 65536  
Total time 1 minute

L. Hobson LAH 400/402B  
STANDARD 1H OBSERVE

Solvent: CDCl3  
Ambient temperature  
Sample #5  
File: 502  
Queue Name: Oct21a  
Date: Oct 21 17  
INOVA-500 "Atlas"  
PULSE SEQUENCE  
Pulse 45.0 degrees  
Acq. time 1.638 sec  
Width 20000.0 Hz  
448 repetitions  
OBSERVE C13, 75.3963141 MHz  
DECOUPLE H1, 259.8473785 MHz  
Power 40 dB  
continuously on  
WALTZ-16 modulated  
DATA PROCESSING  
Line broadening 1.0 Hz  
FT size 65536  
Total time 12 minutes

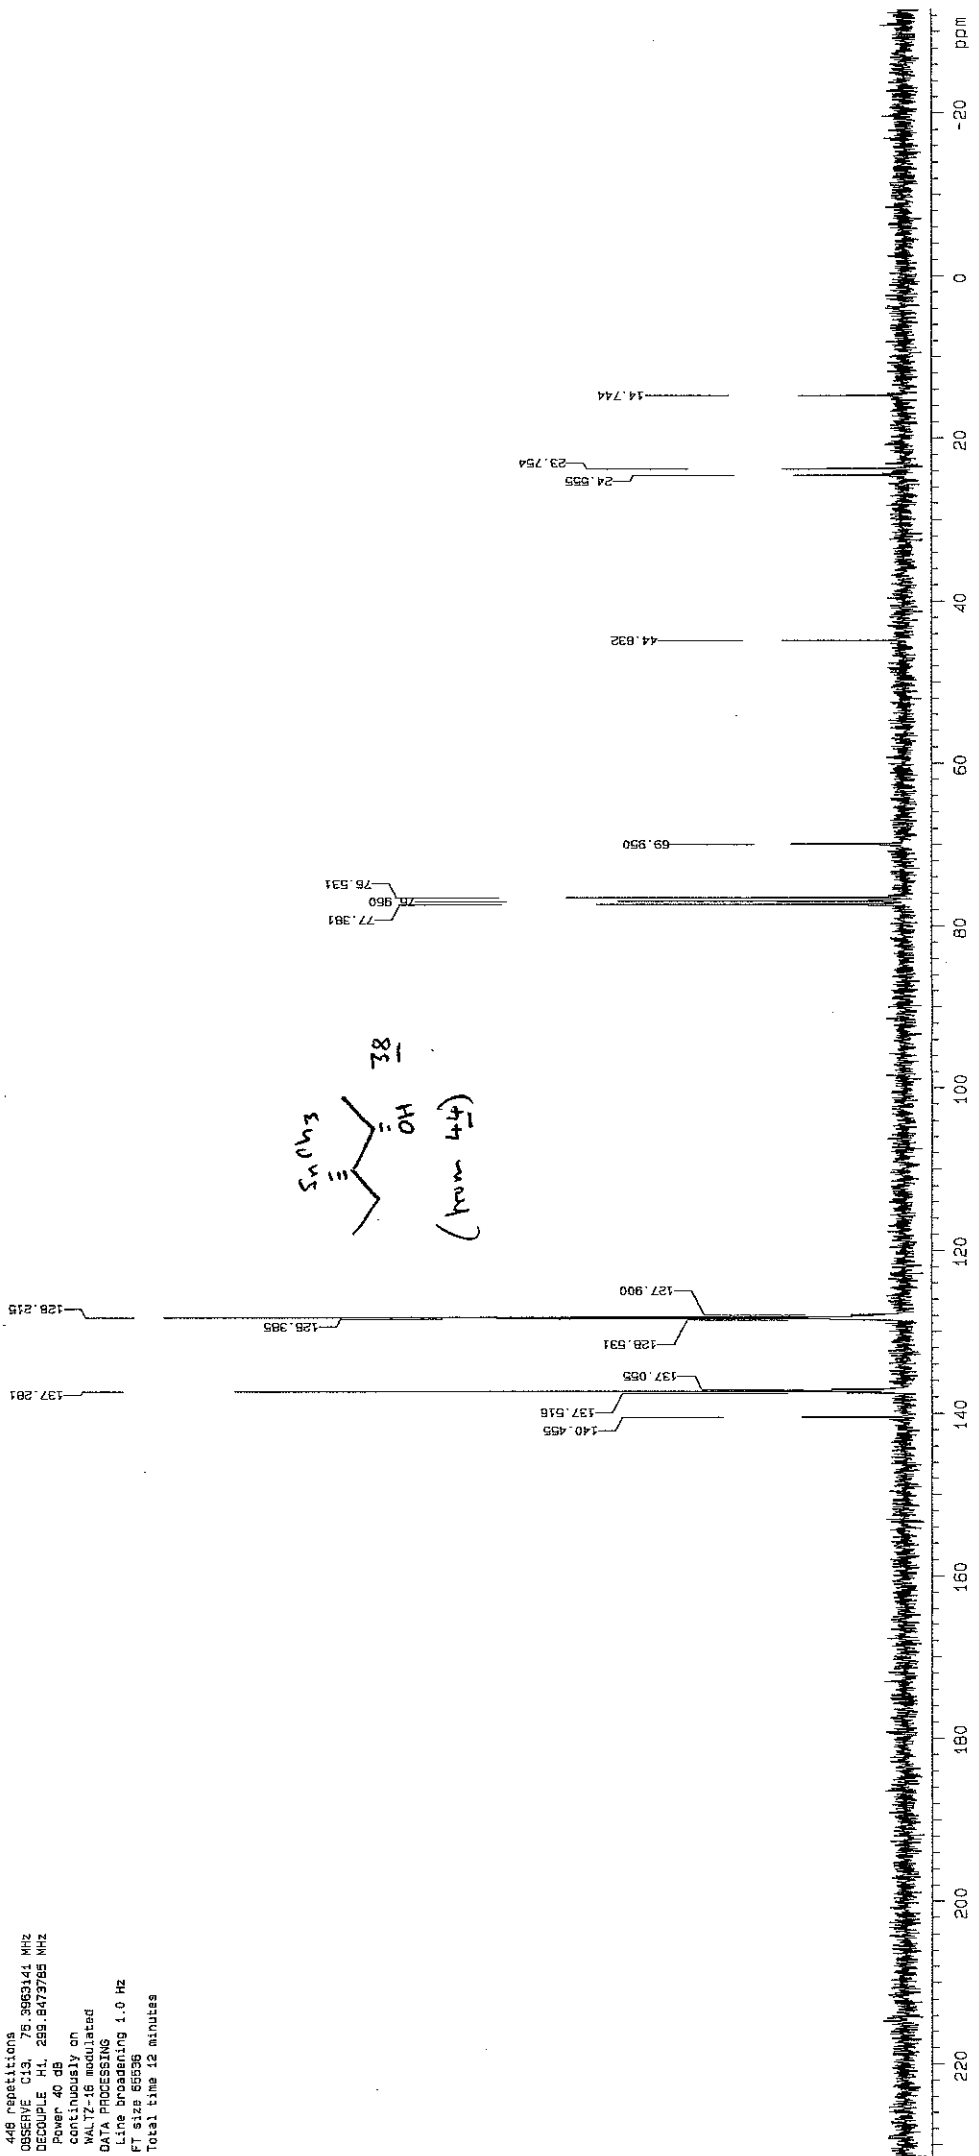

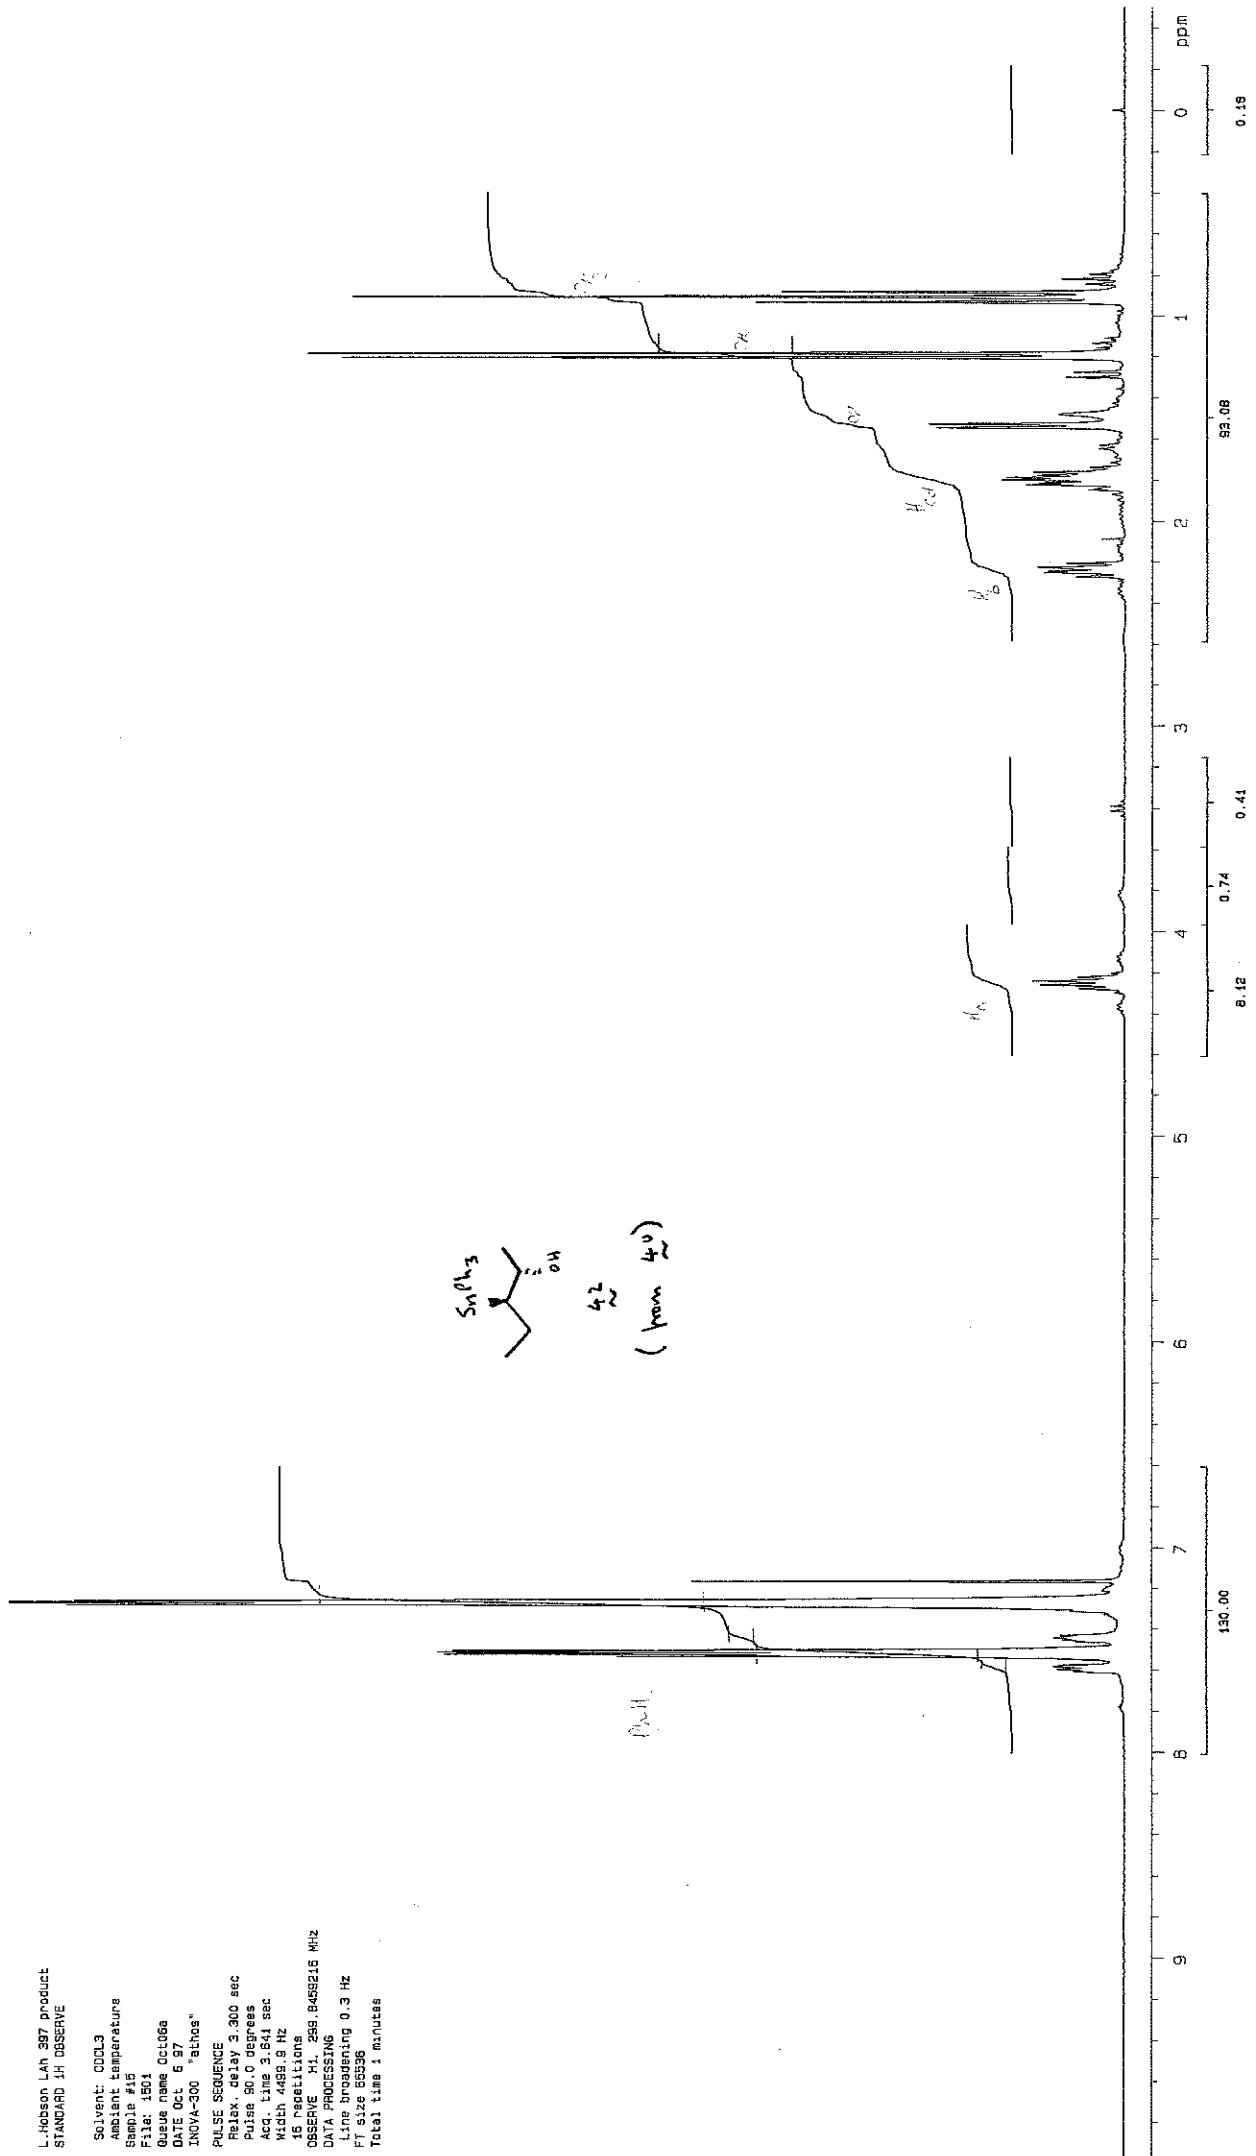

L. Hobson LAH 387 product  
STANDARD 1H OBSERVE  
Solvent: CDCl3  
Ambient temperature  
Sample #15  
File: 1501  
Queue name Oct06a  
DATE Oct 6 97  
INOVA-300 "athos"  
PULSE SEQUENCE  
Relax. delay 3.300 sec  
Pulse 90.0 degrees  
Acq. time 3.541 sec  
Width 4499.8 Hz  
16 repetitions  
OBSERVE F1, 299.8458215 MHz  
DATA PROCESSING  
Line broadening 0.3 Hz  
FT size 65536  
Total time 1 minutes



L. Hobson LAH 357 bottom spot  
STANDARD 1H OBSERVE

Solvent: CDCl3  
Acq. time 1.638 sec  
Width 20000.0 Hz  
240 repetitions  
OBSERVE C13, 75.3865141 MHz  
DECOUPLE H1, 252.8475785 MHz  
Power 40 dB  
continuously on  
WALTZ-16 modulated  
DATA PROCESSING  
Line broadening 1.0 Hz  
FI size 65536  
Total time 6 minutes

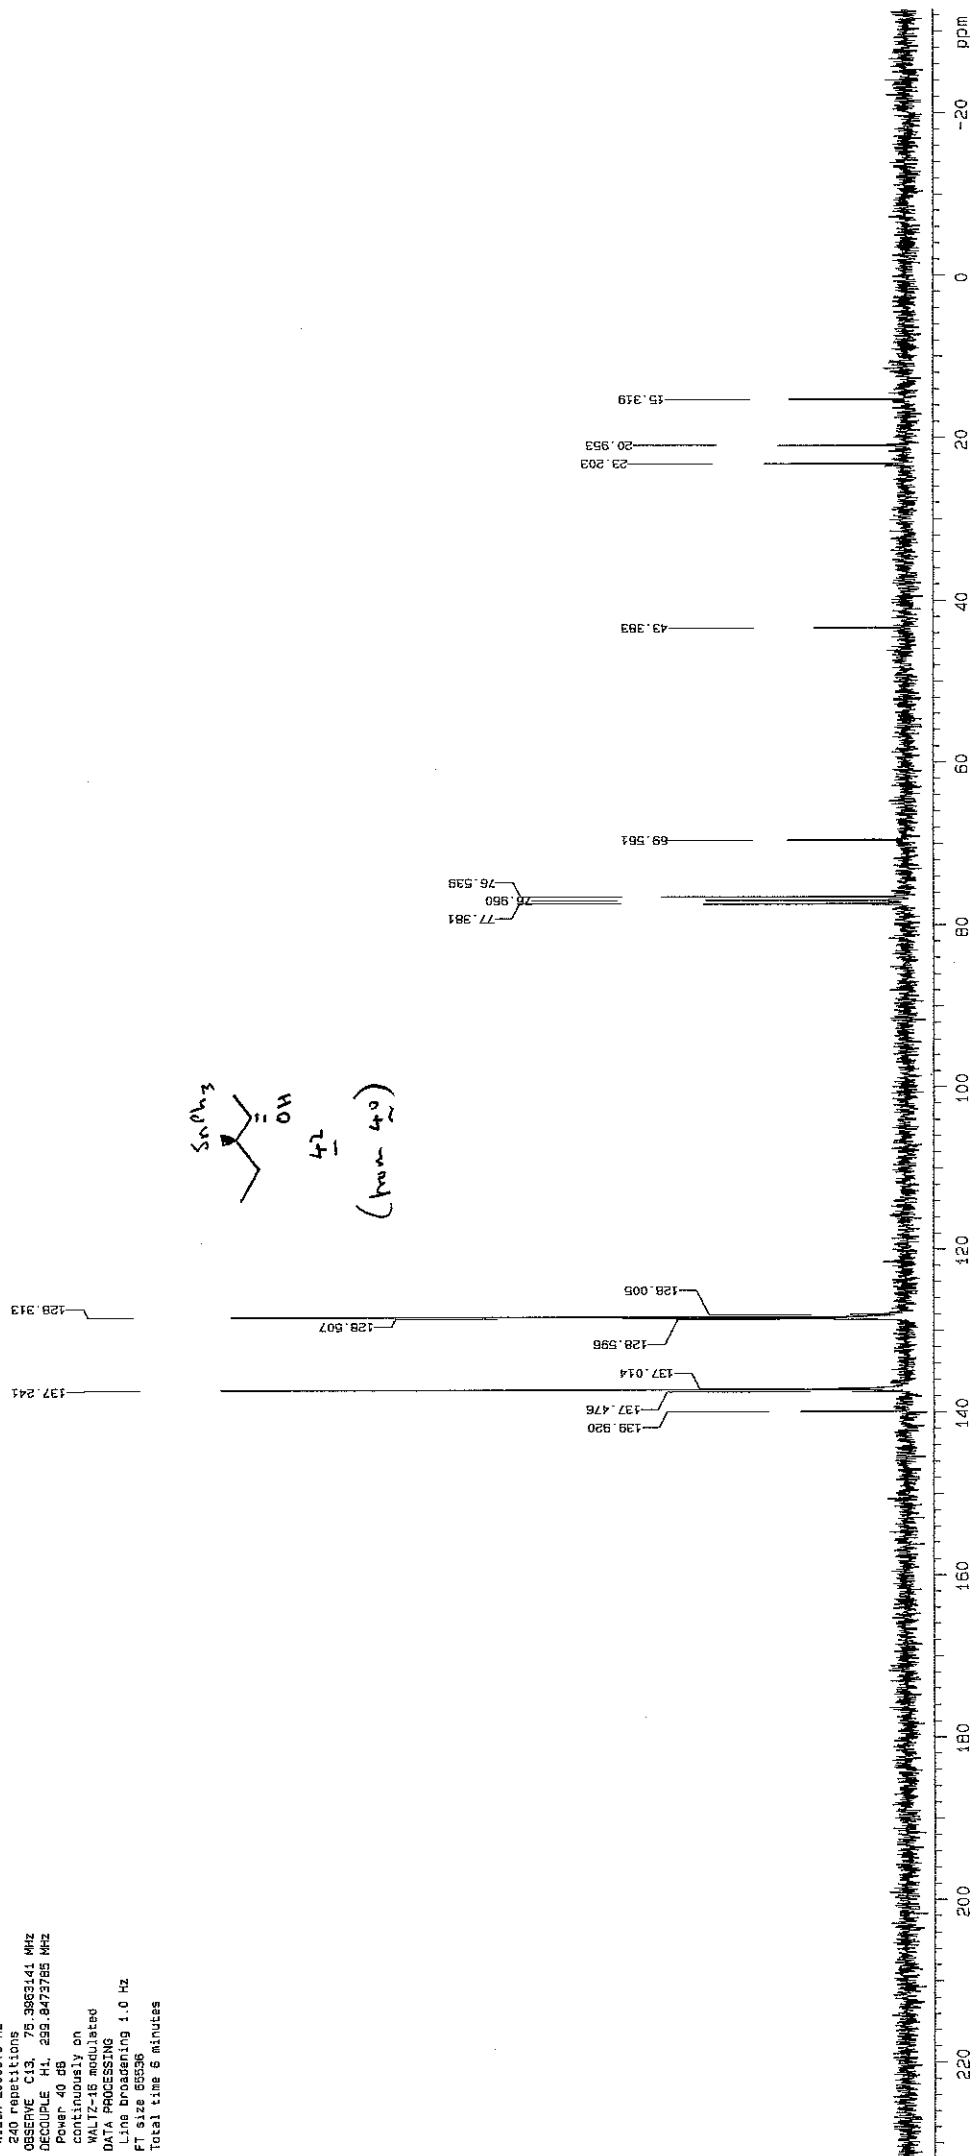

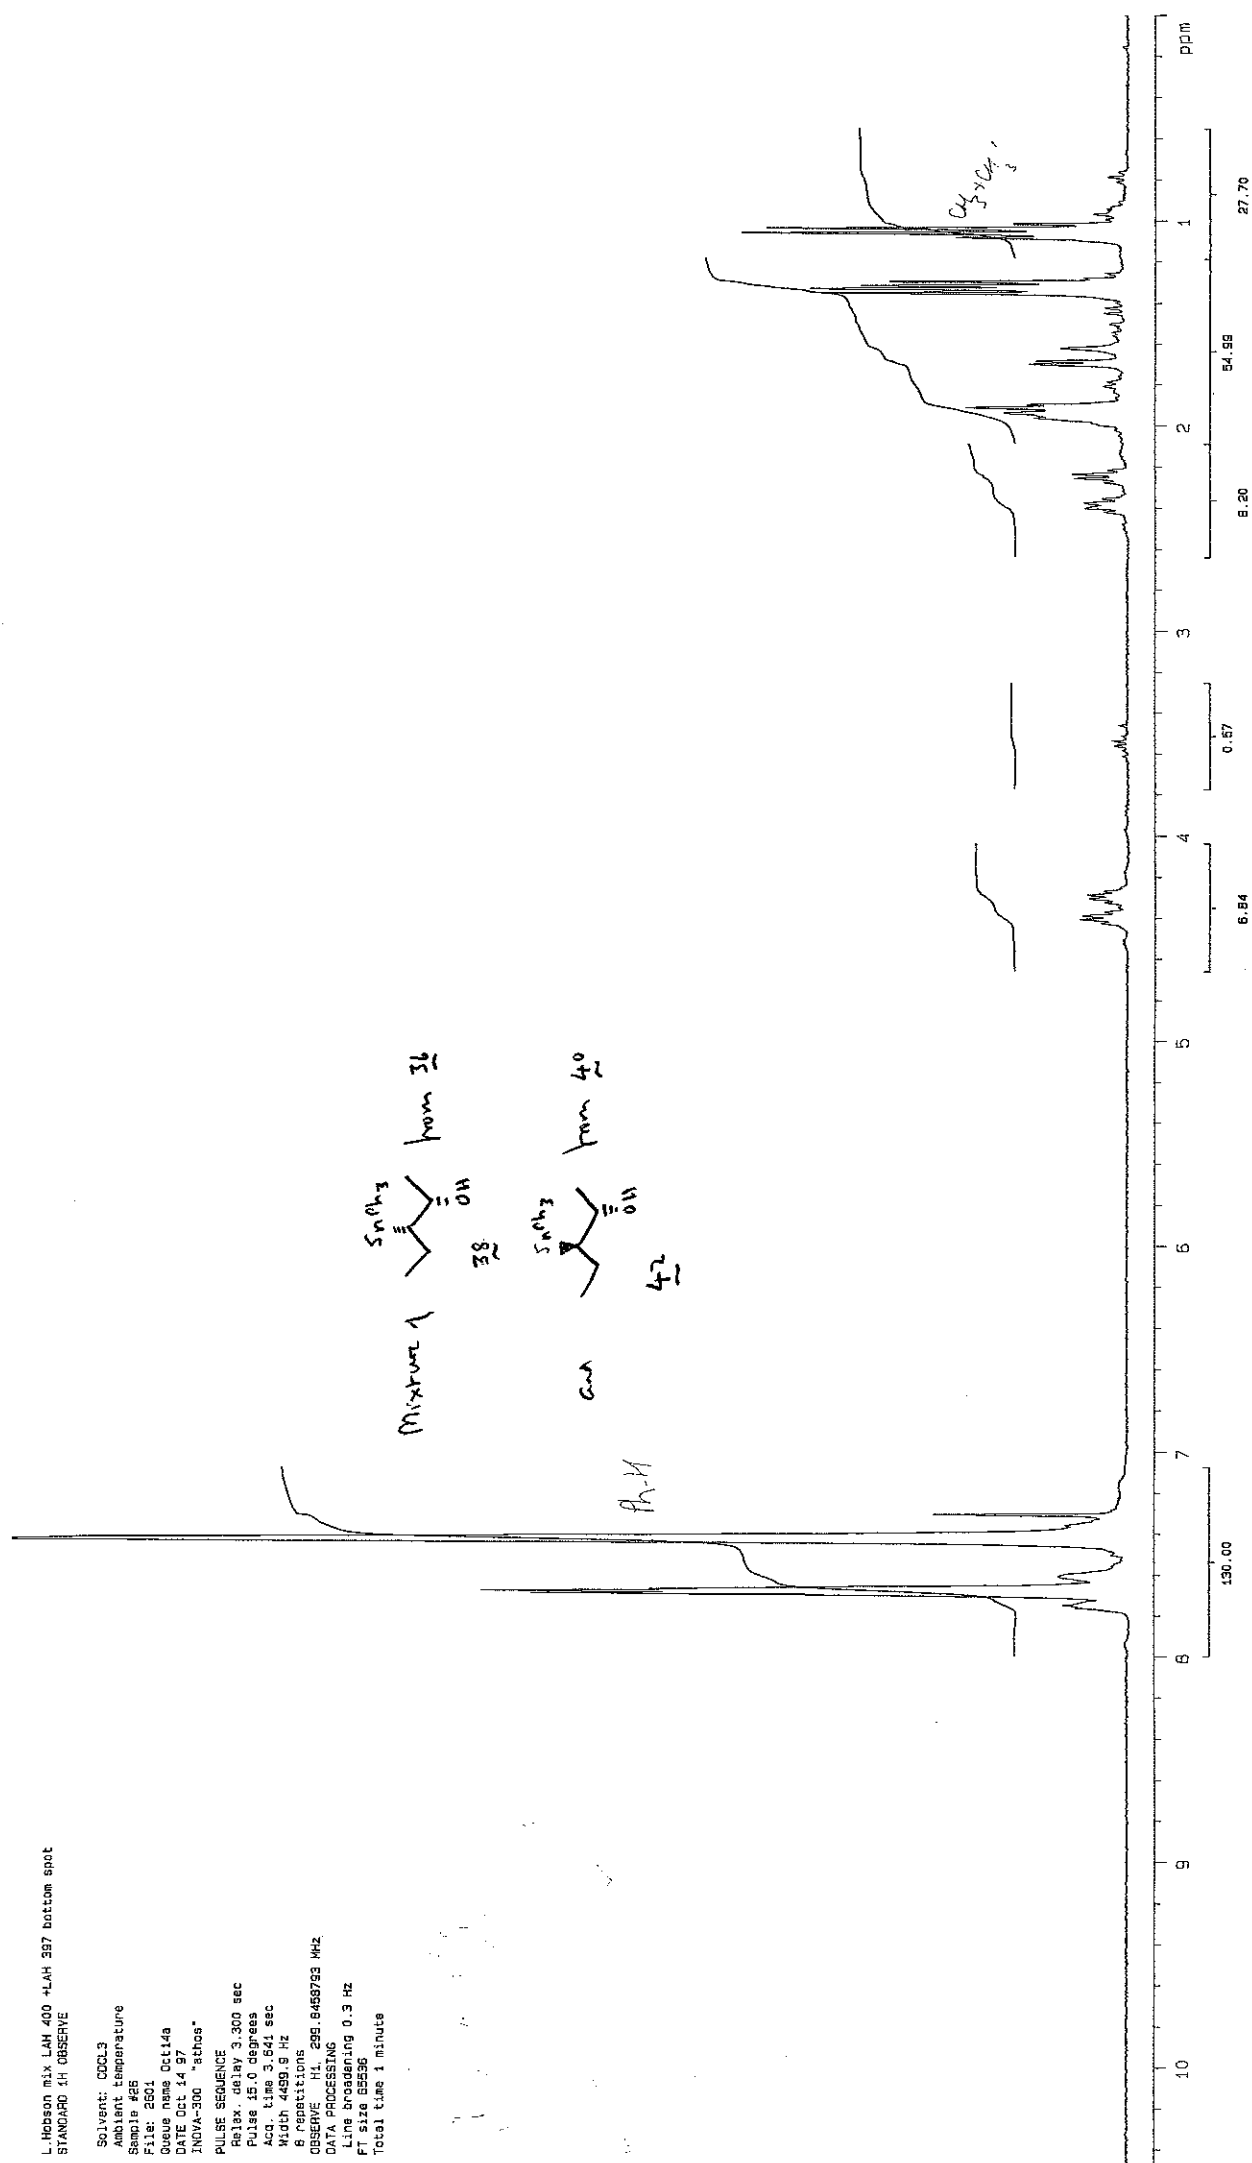

L-Hobson mix LAH 400 +LAH 387 bottom spot  
STANDARD 1H OBSERVE

Solvent: CDCl3  
Ambient temperature  
Sample #25  
File: 2052  
Queue name: Opt14a  
Date Oct 14 197  
INVT-300 900000000  
PULSE SEQUENCE  
Pulse 45.0 degrees  
Acq. time 1.538 sec  
Width 20000.0 Hz  
288 repetitions  
OBSERVE C13, 75.3563141 MHz  
DECOUPLE H1, 299.6473765 MHz  
Power 40 dB  
continuously on  
WALTZ-16 modulated  
DATA PROCESSING  
Line broadening 1.0 Hz  
FT size 65536  
Total time 7 minutes

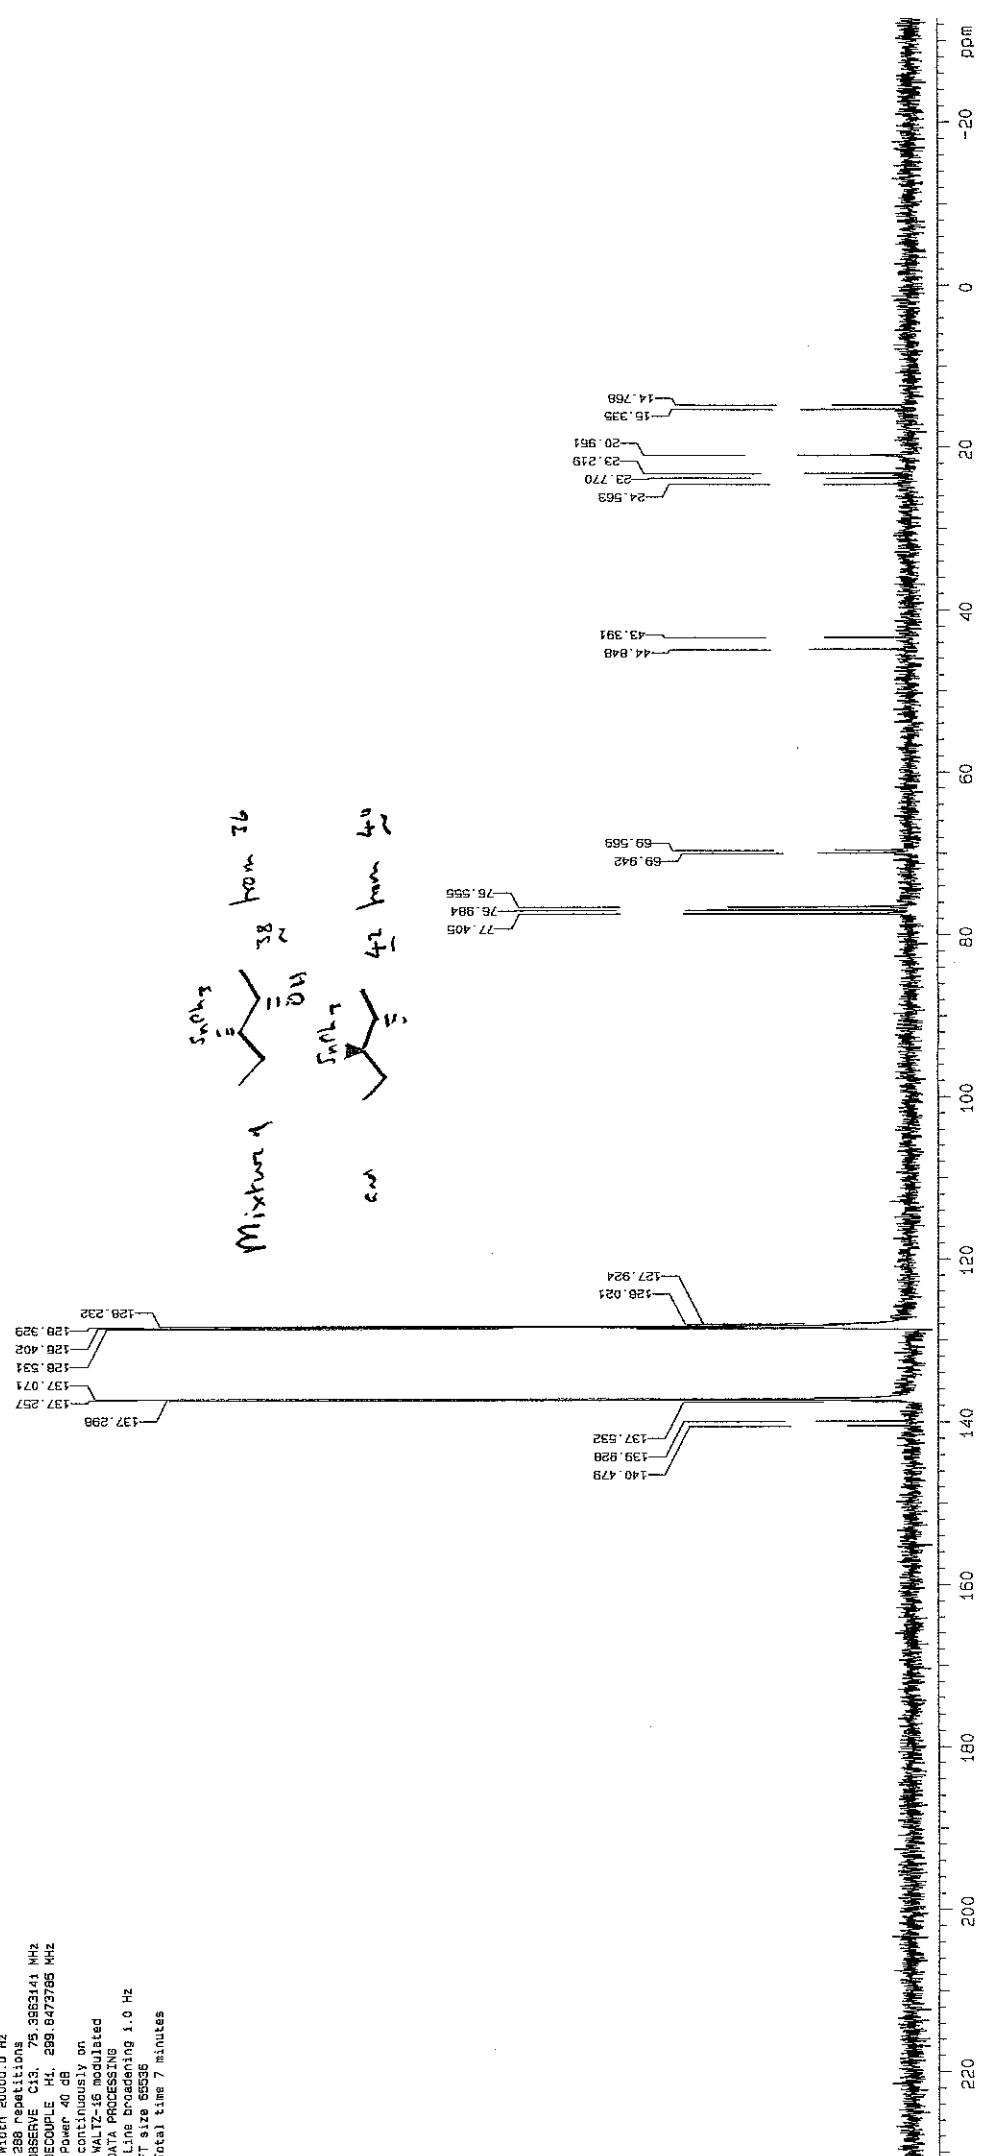

Supplement: c2ob25765c.pdf [file c2ob25765c.pdf]
